# Supplementary material
Source: MDPI journal article supplement (https://www.mdpi.com/2220-9964/6/9/282)
Supplement: s1 [file s1]

## Interview AGORIA GEO-ICT Group

**For more information about this interview, please contact Mr. Maxim Chantillon (KU Leuven Public Governance Institute – [maxim.chantillon@kuleuven.be](mailto:maxim.chantillon@kuleuven.be))**

Positieve houding over de studie – sterke bereidheid om mee te werken – ziet tegelijk een aantal zaken die sowieso heel moeilijk zullen te veranderen zijn (vb. people management bij de federale overheid). Eerder eclecticisch gesprek – vertelt zeer graag – aantal boeiende punten aangehaald. Kritische houding ten aanzien van NGI en (federale) overheid in het algemeen. Wenst vooral meer en eenvoudiger toegang tot data – moet leiden tot een ‘partnerschap’ (vb. via PPP)

### **Overheidsdiensten**

- Federale overheid: wat is dat precies → enkel focussen op de grote spelers of ook op de kleinere entiteiten, agentschappen etc? Stelt voor om agentschappen zeker mee te nemen als users en providers want hebben zelfde problemen als de centrale kern van de overheid.
- Proximus, BPost? Zeer belangrijk maar oppassen want zal het project zeer sterk verzwaren = misschien beter om te focussen op de FODs
- Wallonië versus Vlaanderen: zeer groot probleem – waarom? Eerder onduidelijk (hoewel: VL een duidelijke visie/wetteksten – eigen agentschappen en diensten – ook gefusioneerd / WL: geen fusie, strijd tussen groepen, geen capaciteit).

### **Relatie tot NGI**

- NGI: kritische houding
  - o Maken hun kaarten zelf, sturen mensen in het veld (=niet meer van deze tijd), maar zijn nu toch ook al zover dat ze authentieke bronnen beginnen te gebruiken.
  - o Levert vaak ook niet wat nodig is (de kaarten zijn gewoon niet gedetailleerd genoeg in veel gevallen). Regio's leveren goed werk, maar hebben allemaal hun eigen framework (BeStAd is in dit opzicht zeer problematisch – regio's allemaal een eigen kader, en dan moet er op federaal niveau een oplossing gezocht worden → daar ligt een rol voor het NGI)

### **Visie op de toekomst**

- er is nood aan een partnerschap met de federale overheid (=een samenwerking die gebaseerd is op evenwaardigheid tussen de deelnemers). Tussen burgers en overheid bestaat dit in het algemeen al, misschien dient dit ook ontwikkeld te worden op het vlak van geo. Maar voor de private sector en overheid: zeker = overheid kan niet langer alles zelf blijven doen (waarom: niet de middelen → dataset bouwen kan iedere dienst, maar onderhoud is grote probleem!)
  - o Partnerschap: samen de vruchten delen. Nu: overheid is klant, bedrijf ontvangt geld= mooi maar niet voldoende. Wij willen ook data gebruiken via een PPS.
  - o Bij NGI: er is een mogelijkheid om een versterkte samenwerking aan te gaan maar wordt niet gepromoot. Onvoldoende aandacht voor de private sector.
    - Cru gesteld: wij willen data van het NGI en daar dan geld op verdienen.
    - Probleem: NGI wil niet in een PPS stappen want geen precedents, te moeilijk, te veel kost etc.
  - o Aldus: geen framework tussen de overheid (vooral NGI) en de private sector dat toelaat dat beide er beter van worden.

### **Relaties met Vlaamse overheid**

- Systemen zijn opgezet, er is een kader voorhanden.
- Maar probleem is dat er wederom geen relatie is – maar er is echter wel de open data die beschikbaar is.
- Op Vlaams niveau worden vaak investeringen gedaan vanuit de overheid zonder de private sector voldoende te betrekken – vb. ontwikkelingen van tool om te weten of je woning geschikt is voor zonnepanelen: commercieel zeer interessant voor ons, maar Vlaamse overheid ontwikkeld dit zelf en fnuikt zo ondernemerschap.

Opmerking: wij willen vooral met NGI werken – onze klanten werken veel vaker op BE niveau dan op het lokale Vlaamse, Waalse of Brusselse niveau – daar stoppen de grenzen niet he – daarom nood aan goede relatie met NGI.

#### **Privacy en openbaarheid van bestuur**

- Overheid heeft hier een kader gecreëerd – een overheid kan niet alles regelen en alle situaties voorzien – daarom belangrijk dat er steeds een context geschetst wordt door ons.
- Privacy of openbaarheid is nooit een groot probleem: we weten hoe dat werkt ondertussen – zomaar data vragen dat lukt niet, maar als je aangeeft waarom je het wil gebruiken en het is een gegronde reden (die we altijd hebben) dan lukt dat.
- Vb. FAGG: verplaatsen van een apotheek – zeer strikte criteria, moeten altijd nageleefd worden – wij doen het onderzoek – de data is niet vrij beschikbaar maar we krijgen ze van de overheden (vb. lokale overheden) als we duidelijk motiveren en aantonen dat we data enkel voor die case zullen gebruiken.
- Regelgeving is wel complex.
- Vaak ook gebruikt als een “excuus voor de luiheid”.

#### **Up to date houden van datasets**

- Probleem: niet het opzetten van een dataset – dat kan iedere overheid – wel het onderhoud – kost handen vol geld – geld hebben de overheden meestal niet.
- Overheid moet samenwerken met de private sector om data up to date te houden (= PPP)
- Data die diensten gebruiken klopt heel vaak niet omdat datasets niet in orde zijn.
- Vb. ramp in Gellingen: data klopte niet, nieuw industrieterrein was nog niet opgenomen.
- TomTom heeft daarvoor een systeem ontwikkeld – zij gaan binnenkort systeem aanbieden zodat klanten dagelijks geüpdate informatie ontvangen. → iedere jaar vervalt 15% van de data in de datasets van TomTom: na 3 jaar is de dataset verloren.
- Onze overheid denkt meestal pas achteraf hoe ze hun systemen up to date gaan houden.

#### **FEDICT**

- 10 jaar geleden deden we daar een studie voor rond het gebruik van geo data
- Veel technischer gaan werken, hebben weinig met geodata

#### **Strategie voor Wallonië**

- Consultancy heeft hier mee aan geschreven – zij hadden de kennis niet, ook niet voldoende middelen en er waren spanningen tussen verschillende diensten
- Een externe consultant geeft daar een mogelijkheid tot stabiliteit – tegelijk goed voor de relaties, zeker naar de implementatie fase.

#### **Belangrijkste spelers – partners**

- Het zijn onze partners niet, enkel onze klanten – wij willen wel naar een partnerschap.
- Eigenlijk is de federale overheid grotendeels afwezig in ons klantenbestand
- 5 % federaal, 60% regio's, 35% lokale overheden.
- Werken eigenlijk niet altijd graag voor de federale overheid omdat het vaak zo moeilijk loopt: vb. FOD economie: vaak geen duidelijke contactpersonen, geen actie die ondernomen wordt, probleem van expertise etc.
- Maar: komt ook bij private spelers voor → wanneer ICT niet de kern van hun business is, dan treedt er vaak verwaarlozing op = probleem. Echter, binnen de overheid zou het wel een centraal deel van de business moeten zijn.

#### **E-service naar de toekomst toe**

- Portalen zijn niet langer de manier van werken, dat was 5 à 10 jaar geleden zo maar nu niet meer.
- Burgers verwachten een direct antwoord op hun vragen – niet zo'n grootste gemene deler antwoord zoals het vaak voorkomt bij overheden.
- Nood aan meer flexibiliteit en functionaliteit → privé sector beseft dit en gaat daar op springen wanneer de overheid het laat afweten.
