# Supplementary material
Source: MDPI journal article supplement (https://www.mdpi.com/2220-9964/6/9/282)
Supplement: s1 [file s1]

## Interview Rijksarchief

**For more information about this interview, please contact Mr. Maxim Chantillon (KU Leuven Public Governance Institute – [maxim.chantillon@kuleuven.be](mailto:maxim.chantillon@kuleuven.be))**

- Doel van RA: zichzelf laten bestaan en overleven – zowel budgettair als personeelstekort – zeer problematisch
- Voogdijminister: Elke Sleurs, maar “we hangen niet vast aan de minister”: ook contacten met Alexander De Croo – o.a. voor de ontwikkeling van eArchiving tool – specifiek gericht op de overheden.
- FEDICT: zal ophouden te bestaan – alles zal geïntegreerd worden tot één horizontale dienst – 1 organisatie die de verschillende horizontale diensten omvat (Kanselarij, P&O, FEDICT, Budget & Budgetbeheer) – vermoedelijk meer informatie op .be
- Velle moedigt aan om de politiek te benaderen - vaak één van de grote problemen is te weinig politieke steun (Elke Sleurs, Steven Vandeput, Alexander De Croo)
- Duitsland: Deutsche Forschungsgemeinschaft – eerder op Länder niveau
- Mogelijk case studies:
  - o Cartesius – sterke link naar NGI
  - o APE – organisatie voor het samenbrengen van digitale archieven, de geografische component ontbreekt echter. Kan interessant zijn om te kijken hoe deze kan ingebracht worden in het systeem.
- Relatie tot Patrimoniumdocumentatie: eerder zwak – kaarten blijken niet steeds van goede kwaliteit.
