# Supplementary material
Source: MDPI journal article supplement (https://www.mdpi.com/2220-9964/6/9/282)
Supplement: s1 [file s1]

## Interview Proximus

**For more information about this interview, please contact Mr. Maxim Chantillon (KU Leuven Public Governance Institute – [maxim.chantillon@kuleuven.be](mailto:maxim.chantillon@kuleuven.be))**

Een eerste gesprek: voorstelling van het project, vragen en antwoorden. Enerzijds werd een eerder meta-houding aangenomen (wat is geo, wat is overheid), anderzijds werden een aantal concrete toepassingen belicht. Sterke steun voor het project – vinden het NGI een zeer interessante partner. Ook top van het bedrijf ondersteund de nood om te werken aan het intensiever gebruiken van geodata.

Visie op project: “Probeer de staatsstructuren te overstijgen” (in reactie op feit dat er sterke verschillen zijn tussen de regio’s onderling en in relatie tot de federale overheid). Stelden voor om naar het VITO te kijken aangezien zij interessante zaken doen voor VL die het NGI op federaal niveau zou kunnen doen.

Geo:

- goed nadenken over de insteek die er nodig is – er is namelijk een continuüm
  - o enerzijds de e-services die een geo insteek hebben of hier gebruik van kunnen maken in de toekomst
  - o anderzijds de geodatasets die kunnen gebruikt worden om te komen tot een systeem van e-services. (= focus van Proximus: heel veel data beschikbaar – hoe kan die data gebruikt worden?)
- Heel veel diensten echter zitten aan de eerste zijde: ze hebben e-services, ze hebben data maar ze weten niet dat er een geo element is of hoe ze dit kunnen toepassen.
- We moeten meer lezen “zweven” = op dit moment een complete fragmentatie van het geo landschap aan de gang – dit biedt mogelijkheden voor de private sector, maar tegelijk ook wel problematisch voor de overheden.

BeAlert:

- heel interessant project voor Proximus omdat de data daar gebruikt kan worden.
- Tegelijk: crisiscentrum heeft geen visie op geo.

Geo strategie binnen Proximus:

- Uitgewerkt door een van de medewerkers (aantal jaren geleden) – krijgt sterke steun van CEO Leroy
- Begonnen met het gebruik van mobiele data voor toerisme, steden opkomst, evenementen etc.
- Eerst waren er goede relaties met de FOD economie, daarna gegroeid naar Eurostat, vandaar naar UN, OECD en Wereldbank
- Voorbeelden
  - o Vb. gebruiken van mobiele data voor volkstellingen: FOD Economie deed dit handmatig maar nu via mobiele data.
  - o Vb. overnachtingen in Limburg: FOD economie had eigen data maar op basis van rapportering doorgegeven via hoteleigenaars – in realiteit veel meer overnachtingen – kon afgelezen worden via de mobiele data van Proximus + land van herkomst van bezoeker eveneens zichtbaar.
- Dit moment echter geen winstgevende activiteit – naar de toekomst toe zal dat belangrijker worden.

Relatie tot de overheid:

- Eerder vaag en onduidelijk op dit moment – belangrijkste contactpunt is FOD Economie (specifiek voor statistiek)

- Verhouding tot het NGI: NGI en Proximus willen applicaties aanbieden met diensten via een webportal, dit zou dan data bevatten voor bedrijven, users etc. NGI zou hier de kaarten voor leveren – maar: nog in de kinderschoenen. Zou leiden tot een uitwisseling van kennis: NGI zou data ontvangen, Proximus zou de kaarten ontvangen.

Voorstel voor project:

- Ontwikkeling een eigen case waarbij verschillende systemen worden samengevoegd en verschillende overheidsinstanties samenwerken.
- Vb. BE transport systeem dat alle publieke transporten op BE niveau verenigt via één applicatie waarbij je een bepaalde kost hebt en iedere dienstverlener op het traject een gedeelte van de winst krijgt (op basis van afstand en tijdsduur).
