# Supplementary material
Source: MDPI journal article supplement (https://www.mdpi.com/2220-9964/6/9/282)
Supplement: s1 [file s1]

## Interview POD Maatschappelijke Integratie – FOD Financiën

**For more information about this interview, please contact Mr. Maxim Chantillon (KU Leuven Public Governance Institute – [maxim.chantillon@kuleuven.be](mailto:maxim.chantillon@kuleuven.be))**

### Notes:

POD Maatschappelijke Integratie is a small organisation, main task is support to OCMWs and others Federal Public Services. Support to OCMWs happens via the headquarters in Brussels, support to Federal Public Services via 'detachment'. FPS Finance currently has three civil servants of POD Maatschappelijke Integratie that work for them, in three different locations. One of them is Antwerp. This interview was double: person of POD Maatschappelijke Integratie was present as well as her 'mentor' in the FPS Finance. Role of the POD civil servant: 'be an expert in social ex/inclusion and poverty as a result of your own background'.

### Main points:

- Ensure the social inclusion of citizens in the digital system. This can partially be done via a simplification in the e-service models, and partially via an increase in trust. However, there will always be a part of society (X %) that prefers to use personal contacts – can take place in a double way. 1) ensure that citizens can come to the location where the administration is located, to explain their issue. 2) via an e-service that includes direct contact with citizens. However, this kind of digital exclusion is not comparable with the traditional definition that is given to 'digital divide'. In the mainstream definition, digital divide points to the exclusion of citizens as a result of the inaccessibility of e-services – i.e. material reasons why citizens are unable to use the internet, and as such e-services. This type of digital divide is more problematic and points to citizens that use internet and e-services from the private sector (e.g. Snapchat, Facebook, bol.com, Kapaza etc.) but that do not use e-services of the public sector. As such, it can be labelled as 'a public sector digital divide'.
- Geospatial data is used, but not at the core of their activities. However, tax fraud detection is supported via geo-spatial information. Again, the administration is using geo-information, but is partially unaware of the possibilities that it would offer for their administration, its functioning and results-achievements.

### Meeting output (by respondents):

FOD Financiën – POD MI heeft drie ervaringsdeskundigen toegewezen aan de FOD Financiën, nu op het budget van de FOD Financiën. In het leven staan en dan hun kijk overbrengen op de verschillende diensten. Doel: onmiddellijk in het veld staan en een duidelijke link naar de bevolking krijgen. Digitaal is daarbij een zeer groot probleem – overheid werkt aan de digitalisering, maar de bevolking heeft een probleem: ze willen een gezicht, ze hebben niet voldoende link met digitalisering – we moeten digitaliseren, maar het andere moet er ook nog zijn. Financiën lijkt wel één grote blok, maar dat is niet zo in realiteit: inning versus invordering – maar daar zit dan een ervaringsdeskundige die er aan werkt. Wij bieden veel digitalisering aan maar dat werkt niet voor iedereen.

Privacy commissie – is een probleem – wij zijn "trusted partners" – ze moeten ook vertrouwen geven, een waakhondje van maken. De data zou eenvoudiger moeten gedeeld worden tussen de verschillende diensten. Je zou er ook één overheidsdienst van kunnen maken. Zo de data eenvoudiger delen.

Locatie wordt niet gebruikt – ik heb daar geen weet van, het zou echter wel kunnen. Voor de controle diensten wordt er een datamining uitgevoerd op de te controleren dossiers. Daar zit natuurlijk een bepaalde geo-element in. Vb. bakkers, beenhouwers enzo worden genomen, het kan dat daar ook locatie bij gebruikt wordt. Daarvoor moet je het datamining model bekijken. Wat wel is, is de de facto omscholing naar een administratie van wie de dossiers op basis van postcode toegekend. Dus als je verwijst, dan verhuist het dossier automatisch ook mee. Wij werken op basis van de postcodes. In de

modellen zit dus misschien wel een locatie-element. Het lijkt me logisch dat ze het bij de datamining gebruiken. Andere administraties gaan dit wel bekijken en dan de informatie aan ons doorgeven. e-services: dienen vooral eenvoudig toegankelijk te zijn.

De drempel is lager, dus je zou denken dat ze er wel gebruik van maken. Maar toch doen ze dat niet, ze gebruiken de webpunten enzo. gewoon niet. Waarom doen de mensen dat niet? POD is bezig met de eID, dat zien we hier binnen de FOD Financiën ook. Het werkt niet altijd, dus dat maakt het al heel moeilijk. Maar voor de online tools heb je het wel altijd nodig. De sociale organisaties in Antwerpen hebben vaak een computer, maar ze geven geen opleidingen of inlichtingen aan de mensen die het nodig hebben. Ik denk na over de kloof want ik ben er heel graag mee bezig, ik probeer de familie in te lichten.

Hebben ze algemeen een goed zicht, nee het is geen echte cloud – het is eerder in de mist.

POD klanten – OCMW en financiële middelen (voedselhulp, enzo.) – er zijn mensen die een leefloon trekken, maar die proberen ook bij andere OCMW's – ze proberen daar meer controle in te brengen. – ze staan daar nog niet zo ver met de digitalisering (precies) – wij zijn een kleinere organisatie – dienst ervaringsdeskundigen en dienst voedselbedeling heeft rechtstreeks contact met de burgers – ervaringsdeskundigen bij de RIZIV, FOD Economie, FOD Pensioenen, FOD Financiën, FOD Binnenlandse Zaken (Vreemdelingenzaken).

Er is nood aan een algemeen model voor de kleinere diensten, vaak gaat de fiscus met die diensten samenwerken voor het budgettaire model. Struikelblok voor jullie: de Privacy Commissie – de diensten dienen hun informatie te delen met elkaar, het striemt de goede werking van de overheid en dat is een serieus probleem. Ze zouden beter, voor de overheid zelf, alle informatie openstellen. Ze kunnen voor hun core-business daar dan gaan uit putten, maar alleen voor de diensten en data die er toe doet en die nuttig is voor een bepaalde dienst. Justitie is vooral een groot probleem, zij moeten vooral gaan digitaliseren.

Cultuur verandering is moeilijk. Als het over informatie gaat die wij nodig hebben, dan verwelkomen we dat. Als wij toegang krijgen is dat fijn. Maar als je een deel van je eigenheid en bevoegdheid moet afgeven dan is dat niet leuk. Stroomlijnen is nooit aangenaam, maar het is wel nodig. Collega's hebben het daar moeilijk mee, ook al zorgt het voor minder werk. Sommigen gaan er echter wel tevreden mee zijn. Aantasting van de job inhoud. Door meer informatie, verkleinen de mazen van het net en dat maakt het dan aangenamer. Maar alles wat met justitie loopt maakt het moeilijk.

De leeftijd van de collega's maakt het er ook niet beter op. Kritieke diensten is 1 op 1 vervanging, algemeen is het 3 op 5 – dus die balans zit wat fout. Inning en invordering is het 3 op 5. Het contactcenter is 1 op 1, het beheer van controle diensten is 1 op 1. De controle is 1 op 5. Het beheer is de basis en dat is onze core business, het navolgen daar loopt het moeilijker. Het controle beleid is afhankelijk van de mensen.

BUPA (externe ondersteuning): ze kijken na wie er werkt, dat is op maat van dienst en dan bepalen ze hoeveel volk er werkt. Vb. 60 personen voor 600.000 personen. Misschien levert het NIS die data wel aan.

Onze loonmassa is sterk afgenomen, maar dat was een harde noot om te kraken. Wij hebben erg veel volk verloren, maar wij zijn flexibel. Daarnaast heeft de digitalisering dan ook nog gezorgd voor een verandering in de job-inhoud – dus dat zorgt voor enorme frustratie.

Innovatie wordt ook niet echt aangemoedigd, het is een erg logge structuur. De lijnen zijn korter gemaakt, je kan je ideeën dan wel laten weten dus dat is wel beter dan vroeger, maar het loopt niet altijd even vlot. Het is nogal stug. Innovatie wordt niet steeds geapprecieerd. Maar we zijn vast benoemd, dus je mag al eens je eigen standpunt verdedigen. Individualiteit en onafhankelijk is enorm belangrijk. Wat systemen betreft komt de innovatie vooral van bovenaf, maar de online tools komen vaak van de kleine basis en als het goed werkt → vroeger down-top, nu vooral top-down. Maar misschien ook niet helemaal.

Kadaster? Nee niet veel contact, maar we hebben wel Properties on Web. Dat werkt wel goed, maar wij hebben dat eigenlijk niet nodig voor onze informatie. Google Maps is daar veel gemakkelijker voor ons. Blijkbaar hebben ze de geo-informatie echter wel nodig om de belastingcontrole te doen. Qua

geo kan er echter nog veel meer informatie doorstromen: gemeenten, Vlaamse overheid enzo. De overheid moet de data zelf doorgeven, en dat gebeurt op deze manier nog te weinig.

Maar we zien dat de overheid nu ook begint te privatiseren, zij moeten met 'overheidsgezag' (de regels van de overheid mee uitvoeren) bekleedt worden. Dus als wij die info van de private sector willen, dan moeten we daar aan werken dat zij dat moeten doorgeven. De informatie zit bij private sectoren, en dat is een probleem. De burgers moeten de informatie kunnen ontvangen, en wij moeten daar de hiërarchische druk opzetten.

Van zodra de databanken beschikbaar werden hebben we daar gebruik van gemaakt. Maar nog niet steeds gedigitaliseerd. DAVO functioneert faliekant slecht, daar moet aan gewerkt worden. Het computermatig-systeem luistert niet naar de wet – dat is nu een hot item om dat te digitalisering – daar is de input van de controle van het Rekenhof gekomen. Het lijkt een slecht IT systeem te zijn voor DAVO (dit is blijkbaar algemeen – DAVO is nog slechter, daar moet aan gewerkt worden).

Er zijn erg veel diensten die gebruikt worden op een digitale manier.

Brussel staat hiërarchisch niet hoger, Marc Vanhoutte beslist hier in dit gebouw, mijn bazin (in Gent) beslist over de werkwijze.

Waarom vallen mensen af? Adres, taal, achterstand in onderwijs, verlies van job enz. → daar is de mankracht dan voor nodig. Wij moeten onze tijd daar vooral in kunnen steken, want de basiszaken moet geautomatiseerd worden.

Alg: nood aan betere gegevensdeling tussen de verschillende overheidsdiensten. Probleem vaak: de originele documenten zijn nodig (digitale documenten moeten aanvaard worden).

Politiek boycot dat wel voor een stuk. De administraties moeten eigenlijk sterker gemaakt worden.
