# Supplementary material
Source: MDPI journal article supplement (https://www.mdpi.com/2220-9964/6/9/282)
Supplement: s1 [file s1]

## Interview DGO Economy

**For more information about this interview, please contact Mr. Maxim Chantillon (KU Leuven Public Governance Institute – [maxim.chantillon@kuleuven.be](mailto:maxim.chantillon@kuleuven.be))**

In het kader van onze administratie willen we meer focussen op de gebruikers en op de digitalisering – en het lijkt ons dus nuttig om met jullie te spreken, we weten dat jullie vooral op korte termijn werken. Maar misschien is het wel nuttig voor ons op de langere termijn, daarom graag meer weten over jullie onderzoek.

Belangrijk: een e-service voor geo is ook technische enigszins verschillend van andere e-services die geen gebruik maken van geodata.

Probleem is niet de administraties, wel de politieke bereidheid.

Lijkt te bevestigen dat er een silo-cultuur bestaat.

Directrice-Generale – 1 van de 9 diensten van de SPW. 1 sec-generaal die transversaal is, 1 directie-generaal die transversaal (= ondersteuning) en dan 7 thematische diensten. Er is coördinatie maar geen hiërarchie. Sinds twee jaar hebben we 9 personen die aangesteld zijn voor de 9 diensten en samen hebben we een transversaal programma uitgewerkt. Dat is een grote verandering met het vroegere plan en de vroegere manier van werken. Er is nu dus wel een samenwerking en veel minder silo-cultuur. We zien dus de dingen veranderen, en de grenzen worden verlegt. De vier grote doelstellingen: 1. Oriëntatie naar de gebruikers. 2. Vereenvoudiging en numersation. 3. De competenties van de werknemers 4. AGILE functioneren: hoe daar aan verbeteren.

Binnen economie willen we echter nog meer doen voor deze vier zaken: Wij willen echt een uithangbord van de digitalisering zijn. Waarom wij? Wij ondersteunen de economie: Mashall Plan en de Strategie Numérique. De bedrijven moeten dus naar de digitalisering. Maar wij moeten dus ook mee en wij moeten niet in het papieren tijdperk blijven leven. Wij zijn het meest achter op dit moment en het was dus logisch dat we een extra stap deden.

Alles wat u zij over coherentie en samenwerking, ja maar in Wallonië bestaat er al heel wat. Strategie Numérique, Minister van Economie en de hele regering. Er is daar al heel wat werk verricht, het is vooral het Agence du Numérique die daar op werkt. We hebben ook de eWBS: zelfde orgaan voor Franstalige gemeenschap en Brussel. Wij werken zo aan een de digitalisering. We moeten de verschillende partners samenbrengen (verschillende niveaus), maar ieder die, binnen de eigen ruimte, te werken aan digitalisering.

Eerste domein is het niet-customer domein, een beetje zoals taks-on-web. Er is een connectie, en de bedrijven moeten alles kunnen terugvinden online en kunnen indienen. We hadden reeds gedigitaliseerd, maar nu moeten we dus ook verder werken. We hebben een zekere autonomie en die moet natuurlijk ook bewaard worden. Sinds één jaar hebben we een erg mooi project: dematerialisation van a tot z – een heel proces.

Het project: sinds vandaag zijn er co-working cheques – vooral voor start-ups. Zit in een base de données en een web applicatie. De ondersteuning van minder dan 20000 euro voor bedrijven zit nu op één platform dat online functioneert – alle types van de co-working zitten daaronder. Daarna ook de andere cheques toevoegen, verschillende administraties werken daar aan mee. DG Economy, Emploi, etc. Dus we proberen transparant te functioneren, één keer dat we dat hebben willen we dat gaan overhalen naar de “espace personellé” van de personen. Iedere maand ontwikkelen we nieuwe applicaties, er is weinig geo data in aanwezig buiten de adressen.

Geo is er niet veel gebeurd. We hebben nu één aanvraag en toestemming, dus geen milieuvergunning, bouwvergunning enz. Dat zal leiden tot een convergentie. Voor geo informatie is er inderdaad niet echt een standaard, dus er is niets echt geoperationaliseerd. De vertraging is vooral ééntje voor de standaarden. Het departement de la géomatique: zij coördineren alles. Wij doen twee geo activiteiten: de industrie en de inplanting van de bedrijven. Dat zijn onze twee belangrijkste geo-activiteiten. Wij willen echter een beheerssysteem dat samenwerkt met de andere diensten. Alles kan nu reeds online,

maar de plannen zijn nog niet digitaal omwille van het gebrek aan standaarden. We proberen te begrijpen hoe de standaarden zullen functioneren.

Open data: de nota zal in de komende weken verschijnen, maar we weten nog niet in welke vorm het zal verschijnen. Maar we weten nog niet of het voor Wallonië, dan wel voor de Franstalige Gemeenschap zal zijn en of het één platform zal zijn of dat alle anderen iets zullen moeten ontwikkelen.

LOGIC (Logiciel implantation industrielles et commerciales): we hebben veel vragen van op het terrein, ze willen de data kunnen gebruiken. Maar dat zal nog een paar maanden duren, voor de open data wachten we op het algemeen kader van de overheid.

Open data: zal moeten verlopen via de licenties – Agence du Numérique is daarvoor verantwoordelijk, zij schrijven de nota voor de regering en nemen de leiding daarin. Wij hebben nog niet veel problemen gehad in verband met de kosten. Maar onze IT is vaak verouderd en we moeten onze data apersonaliseren, maar dat kunnen wij niet met onze infrastructuur, en wij zullen dan per applicatie gaan kijken. De IT is vroeger ontwikkeld, en nu moeten we verder met die IT, maar we kunnen daar niet altijd nieuwe dingen op ontwikkelen, en dat is dan vaak het goede moment om nieuwe systemen te ontwikkelen. De user moet vooral geconecteerd kunnen zijn, niet zozeer wij. Dat is belangrijk, maar gelukkig hebben we nu voldoende budget om dat te herwerken via de Strategie Numérique. Maar dat leidt ook tot een verandering van de werkmethodes. Mensen moeten anders gaan samenwerken, en dat leidt tot een culturele verandering, die verloopt via het management en de personen. Maar dat is gewoon cultuur.

Sinds het begin hebben we op de wettekstengewerkt op zo'n manier dat we alles met de anderen deden. Wettelijk, juridisch en andere diensten werken zo samen dat alles wel lang duurde, maar op een gegeven moment ook allemaal samen klaar was. De mensen moesten van job veranderen enzo, nieuwe concepten leren en nieuwe hieërarchie begrijpen, maar nu is het akkoord wel gegeven in 5 dagen. Er is een enorme vooruitgang gekomen wat de procedures betreft. Het dossier moet niet meer naar de Minister. Dus dat is echt een culturele verandering, en de betaling zelf loopt nu ook in 5 dagen en duurt geen maanden meer. Het samenbrengen van de juristen, IT en anderen heeft geleid tot zo'n manier van werken.

### **Is alles voor IT gemutualiseerd in de transversale dienst?**

Nee, de IT dienst die transversaal werkt heeft alle grote diensten, standaarden enzo. Maar wij, in onze eigen dienst hebben onze eigen IT dienst. Maar we moeten tegelijk zorgen dat we niet op hun tenen trappen. We hebben nu 10 à 15 ITers van hoog niveau, zij kunnen nu specifieke diensten uitwerken. Zij bekijken de markt: wat is er beschikbaar. Zij doen de serveurs en de veiligheid van de SPW. Maar we werken heel sterk samen, zij ondersteunen ons, maar wij doen het uiteindelijk wel. Iedere dienst moet zijn eigen specificiteiten ontwikkelen en zij gaan ons dan ondersteunen.

### **Gaat u naar de specifieke gebruikers om te horen wat zij wensen?**

Vb. de cheques: er was er een reflectie met de verschillende IT diensten en gebruikers, om zo te identificeren wat hun het meeste zou kunnen helpen. Er is dus een ronde geweest, maar vooral met de klassieke partners. Maar de specifieke toepassingen zijn met de gebruikers ontwikkeld. De administraties hebben zo samengewerkt en één loket ontwikkeld (un guichet unique). We werken met gebruikerspanels.

We moeten werken met een professionele methodologie.

Er is een hele groep personen en niet enkel de hiërarchie is belangrijk. Er is een hele communicatie, maar daardoor verliezen we ook heel wat tijd in meeting en daardoor verliezen we tijd. Maar dat is ook de tijd die we gewonnen hebben bij de werking. Maar tegelijk hebben de mensen er niet echt schrik van, want we kunnen geen mensen ontslaan want de meesten zijn vastbenoemd. Maar dat is een progressief proces, de agenten hebben gereflecteerd en zij moeten er mee werken. Zo kunnen we hun overtuigen en zij willen ook naar een vereenvoudigde situatie gaan. Zij leren het product

kennen en de dag dat het er was hebben ze het in gebruik genomen. Op die manier hebben ze de eindgebruikers ook opgeleid.

### **Welke methodologie gebruikt u?**

AGILE, maar dat was met de Agence du Numérique. Maar dat was meer een experiment, hierbinnen nog niet echt AGILE – nog eerder klassiek maar we gaan wel naar een meer AGILE manier van werken. Een probleem is ook de manier van werken: we moeten met de privé werken en zelf IT mensen vinden, maar niet iedereen wil werken voor de overheid: wij kunnen onvoldoende materiële zaken bieden (vb. gsm, auto enz.). We hebben hier te maken met een crisis op de markt: er is onvoldoende aanbod op de markt. In tijden van economische crisis kunnen wij mensen aanwerven, maar wij kunnen uiteraard niet wachten.

Maar daardoor is er ook een interne breuk voor de IT: wij kunnen onze mensen, die niet altijd met IT werken, niet steeds opleiden daardoor. Maar het is niet eenvoudig om de correcte mensen te vinden. We hebben veel aan de inspectie van de sociale zekerheid, maar die zit hier in Namen. Niet aan Brussel. Wij hebben contact met het Kadaster, maar er is geen geïnstitutionaliseerde relatie. Emploi wel, economie niet. Er zijn verschillende contacten ieder jaar, maar we gaan onze eigen werking ontwikkelen en de eigen wetgeving ook.

Op het regionale vlak is het goed, wij zijn Emploi. 330 personen hier. FOREM is meer dan 1000 personen. Wij moeten de espace personelle van de SPW ontwikkelen, de FOREM ontwikkeld zijn eigen dienst. Iedereen is zijn eigen baas, dan is de vraag of we het moeten opleggen aan iedereen. Dat is aan de overheid en de regering. Zij moeten die keuze maken. Maar het is niet enkel het budget (geen budget voor verandering), ook over visibiliteit en communicatie naar de anderen toe.

Vb. voor de cheque is het Wallonie en niet de specifieke administratie. Was een erg grote discussie voor vb. het logo van Wallonië. Het vraagt een ongelofelijke omslag in de cultuur. We hebben ook zo'n reflectie over de SPW Economie. Je bestaat niet als je niet communiceert, en dat lijkt ertoe dat je wel moet communiceren. Zijn het de organismen of de delen die communiceren?

Er is erg veel contact met de kabinetten, de administratie doet voorstellen en zij beslissen dan. Er is geen decalage. Wij hebben goede contacten, en erg veel steun wanneer we dingen willen doen.

### **Met vlaanderen?**

We kijken naar bijvoorbeeld de KMO portefeuille, en we passen dat aan aan onze noden en verwachtingen. Eerst Vlaanderen, dan Wallonië en dan Brussel. Wij kijken vooral naar de vlaamse zaken, en er zijn ook werkgroepen en daar proberen we samen dingen uit te halen. Vooral op een lager niveau zijn er contacten, soms zelfs verschillende systemen maar gelijkaardige noden en dan bekijken we die samen. Wij kijken naar de Europese markt, en dan kijken we naar de private markt in Vlaanderen.

Verschil tussen authentieke bronnen en de data die niet authentiek is, maar wel een zekere waarde heeft. Wat is een authentieke bron? Hoe kunnen wij ons realiseren welke data er echt van waarde is? Dat is iets waar wij ook mee zitten, wij kunnen onze data kruisen en bewerken en die kunnen we dan delen, maar dan moet er ook echt een nood aan zijn.

### **Data en de inclusie in de e-services**

Wij zijn niet datacentric, en dat is een probleem. We hebben de gebruikers, en we moeten de toepassingen daarop bouwen en dat is nieuw. Onze data werkt op een bepaalde manier en dat moet dan hertekent worden, en dat is een probleem.

De gegevens moeten dus technisch bewerkt worden, en de architectuur van de bouwstenen, als we een bouwsteen veranderen dan mag al de rest niet wijzigen. Dat is een probleem.

We moeten het systeem aanpassen, en daarna ook nog kunnen blijven aanpassen.

We hebben gekeken naar de sociale zekerheid, de overheid kan bepaalde parameters wijzigen en dat deden ze. Maar tegelijk moesten ze niet het hele systeem gaan ombouwen, iedere administratie moet

impulsen kunnen geven zonder de systemen as such aan te passen. Soms is het dus federaal dat we kijken, soms Vlaams en soms naar de anderen.
