# Supplementary material
Source: MDPI journal article supplement (https://www.mdpi.com/2220-9964/6/9/282)
Supplement: s1 [file s1]

## Interview Eurocities

For more information about this interview, please contact Mr. Maxim Chantillon (KU Leuven Public Governance Institute – [maxim.chantillon@kuleuven.be](mailto:maxim.chantillon@kuleuven.be))

### Questions of Eurocities

**FLEXPUB has a focus on the federal level but what happens in implementation ?** We will aim from the EU Level ( because legislative proposals that needs to be taken into account such as Data Protection, E-Government Action Plan) to Local Communities.

**What would be the role we would like to take at EU Level ?**

We have strong contacts with Vasilios that is involved in the set-up of the EIF.

Generalize the strategy for Belgium to the EU Level (support from the Follow-Up Committee)

**Link with the cities ?**

Include very small villages and major cities and medium cities for the baseline measurement.

Contacts for us ? City of Ghent very much involved in Eurocities (Use of Data, Open Data,...), Brussels Region, Seraing (Part of the Smart City lighthouse project), Antwerp

**How deep can we go on technical framework ?**

Examples for enablers “Law” and “Processes”

**Feedback on our presentation:** not everybody would be interested to join in if they don't understand well the case studies. It is important to identify the

### Questions for Eurocities:

**Explain structure of the organisation and what they do?**

**Structure:** Network of European Cities and work on topics important for cities (environmental, culture, energy, economic development).

**Membership :** more than 250 000 inhabitants but also associated members (smaller cities) and business (Jlighting, ATOS, IBM, IDEAS...). They pay for which forum they are interested

**Activities:**

- Webinars: opportunity to expose them our project but need to be interesting for them!
- SEISMIC: project to design a platform to increase citizen encouragement in cities: status of the project, cases of Kortrijk and Ostende could be interesting for our project
- Knowledge Society Forum
  - o Smart City vision (Collaboration, Processes, Businesses, Interoperability and standards, ,Data, Technologies)
  - o What are the city doing and what can they do better ? Relation with EU, International cities
  - o They meet physically three times a year (meeting in January)
  - o Organizing conferences to exchange with commission and other stakeholders to advance in term of cities work (with GDC)
  - o They develop research activities, studies, smaller scale result, report about Smart Cities to find key recommendations
  - o Opportunity for us : meet them at the forum eetings
- **Sharing Cities** project (started in January 2016)
  - o network useful for our project to expand our research to ctiiies. Burgas really want to do something with geospatial data (traffic management system), London (data management strategy, Webinars about it or find info on the website)
  - o Citizen engagement : engaging on the ground with the citizen to build services (cases about bike sharing, retrofitting) → Public deliverable pretty soon available

- Security Data to observe public places, Case of Burgas is interesting because the city own their data >< data generated by private sector and need to be bought by city
- Methodology : questionnaire, full interview (takes time)
- **Green Digital Charter**
  - initiative to sign commitments, tool to network with the cities
  - acting like a platform to help people come together
- **Urban Platforms**
  - they went directly for the cities to be closer to the citizens and deliver more concrete e-services
- **Citykeys**
  - performance measurement for smart cities all the day down (data, format),
  - Salahosa in Spain: they have a citizen card (e-services, transport card, museums, loyalty card), very much interested to connect with other cities (Utrecht, ...), QR codes to find the deliverables in the leaflet and the framework will be available in January, material useful for food for thought and used to test and disseminate results, useful for us to see the “marketing aspect” of Eurocities (Leaflets, reports, website,...). Problem : cities do not let their employees go to brussels
  - usefulness of Webinars

#### **European Interoperability Framework**

Impact from Eurocities? No opportunity to meet them yet because they aim at involving only national government

#### **Statements about Open Data : European Standard License Model ?**

No current project about it yet. These models imply different political models. Creative Commons license = Common options but also problems with this (personal data, who keeps it, release of some of the data → Finland where cities has taken public led repository of data)
