# Supplementary material
Source: MDPI journal article supplement (https://www.mdpi.com/2220-9964/6/9/282)
Supplement: s1 [file s1]

## Interview SMALS

**For more information about this interview, please contact Mr. Maxim Chantillon (KU Leuven Public Governance Institute – [maxim.chantillon@kuleuven.be](mailto:maxim.chantillon@kuleuven.be))**

Minder met geoinformatie – meer met de back-office, vandaar ook minder geoinformatie nodig want de overheden gebruiken dat minder voor hun interne process maar vooral voor de externe processen. Adressen worden wel gebruikt, juiste adressen enz. zijn wel belangrijk voor ons.

Visie is nodig, moet vertrekken vanuit het beleidsniveau en iemand moet het komen aanreiken – er is niet echt een organisatie die een echte algemene visie kan uitdragen. Oorspronkelijk was het ook niet de bedoeling van FEDICT, de visie van de sociale zekerheden was er echter wel en dat kon toen gezien worden als een veralgemening. Is er nu een visie? Nee die is er niet – die is niet helder, maar er is ook niet voldoende sturing.

Een visie, ja wat is een visie? Als er geen probleem is dan is er geen visie nodig. Heel veel hangt af van de huidige maatschappelijke toestand, maar van het moment dat er een frustratie is dan zit je heel snel op een beleidsdomein en dan heb je een visie nodig. Op één vlak is er zeker een visie nodig: de veroudering van de ambtenaren. Digitale visie is daarvoor nodig, maar de visie ontbreekt nu en nu is ze zeker en vast nodig om ze te kunnen uitvoeren. Moet op een equivalente manier samengewerkt worden tussen de verschillende diensten, per maatschappelijk probleem is er een oplossing nodig. Maar als je de mensen niet vervangt, gaat de opportuniteit verloren. De mensen zijn weg, maar er is geen alternatief zonder digitalisering.

Waarom is FEDICT toen gekozen: er zijn nog voldoende verschillende tussen de staat enerzijds en de sociale zekerheid anderzijds. Het was eerder een natuurlijk zaak om die duale structuur te behouden. Sociale partners doen de sociale zekerheid, maar de overheid en de politiek wou eigenlijk niet dat er inmenging zou komen in de staat zelf. Het is mogelijk om te overstijgen, maar op het niveau van de implementatie is het heel moeilijk. Vooral tussen instellingen van openbare zekerheid en de staat-ministeries.

Wij voelen een enorm verschil om samen te werken met de ONSZ enerzijds en de FOD anderzijds – ze zijn zoveel stroefer, zoveel moeilijker om mee samen te werken. Dat is zo gegroeid. Dat heeft geleid tot een verschillende visie en manier van werken. Maar er moet al echt zwaar gewerkt worden om die op elkaar af te stemmen. Maar met FEDICT, ja toen was er wel afstemming, er was altijd overleg – iedere week bijna. Er zijn ook gezamenlijke projecten, dus er is samenwerking. Vb. voor CESAM. Dus de twee blokken kunnen samenwerken. Er is niemand die in al die jaren heeft tegengewerkt, iedereen wou wel zijn baas blijven. Liever met de eigen identiteit, samenwerking dus maar vanuit de eigen visie. FEDICT heeft zich nooit gepositioneerd als een operationele unit. SMALS was wel operationeel, wij zijn een werkorganisatie. Wij maken geen beleid, maar wij zijn er om uit te voeren. G-CLOUD is een werkactiviteit van ons, maar vooral een reactie van verschillende instellingen. Het is bottom-up gegroeid vanuit de CIOs (IT managers) die zich realiseerden dat de federale instellingen iets moesten doen in verband met de cloud, anders zouden ze overvleugeld worden door de publieke cloud. Ze wilden niet afhangen van de publieke cloud. Dat bedreigt namelijk hun eigen mensen en opdracht, hun privacy – er zijn echt wel issues daarmee. Laat ons dus een gezamenlijk initiatief nemen, maar de instellingen ook. Het is geen klassiek dienstenaanbod. Ze nemen zelf verantwoordelijkheid, geen klassiek model. Het gaat verder dan de klassieke rol. Die beweging kwam samen met het besef dat we weg moesten van de klassieke servers, en naar de cloud gingen – een nieuwe generatie van technologie. Dus twee stromen die op een gegeven moment zijn samengekomen en waar we samen aan gewerkt hebben.

G-CLOUD is bottom-up, toen deze regering dan kwam is het idee er geweest dat er 20% moest bespaard worden. De topmanagers hebben dan willen rationaliseren (binnen de sociale zekerheid, ik vermoed binnen de FODs ook), en dan zijn er 'herschikkingen voor het land uitgewerkt'. FEDICT heeft in de loop der jaren steeds meer budget verloren – dat was zonder visie gedaan. Dat is heel zwaar geweest, ze hebben zich zeer zwaar gefnuikt gezien. Ze deden dus al een heel stuk minder dan vroeger.

Ik vraag mij af of het niet daar vooral bij de budgetten zit. Ze hadden niet echt een operationele taak, schaffen ze ons af, dan gaat er niets meer werken. Ons stil leggen zal een groot probleem zijn, dus dat zal daar ook voor een stuk aan liggen. De evolutie is een effect van het missen van een duidelijke visie. Vooral de verantwoordelijkheid van het beleid, niet zozeer de fout van FEDICT. CESAM, EID, allemaal mooi. Maar niet echt een duidelijke visie.

Het beleid heeft nooit een visie toegestaan aan FEDICT – ze hebben enkel naar de centen gekeken op de verkeerde momenten.

FEDICT onderbrengen in FOD BOSA is zeker niet goed. De OESO verdedigde altijd dat die op voldoende hoog niveau moet zitten en tanden heeft. In Finland zat IT ondergedoken in een andere organisatie, het Ministerie van Financiën. Er was bijvoorbeeld een “enterprise bus”, maar die bestond dan voor verschillende ministeries en telkens apart. In Estland is het veel jonger en kleiner en die konden dat veel eenvoudiger opzetten.

Verwachtingen ten aanzien van FOD BOSA en DTO: we moeten nog wat afwachten – ik weet het niet goed – we gaan proberen om rond innovatie meer samen te werken, maar dat is nog niet ingevuld. Tegelijk wilt dat ook weer niets zeggen, wij werken voor individuele leden. Wij denken niet dat ze met een nieuw project gaan komen en waar wij voor iedereen een rol in zullen spelen. Maar misschien voor kleine dingen wel. Wij verwachten niet dat de nieuwe structuur een rol zal geven aan onze organisatie, het is budget en begroting. IT is niet hun ding vermoedelijk. Het is een verarming van e-government.

Ze proberen samen te werken maar tegelijk proberen ze om een autonomie in beweging te brengen. Samenwerking is goed, maar comply or explain moet niet dwingend zijn. Hoe groter, hoe meer samenwerking er nodig is. Green shift (platform as a service) en G-CLOUD, dat is goed maar zo’n dingen moet je samen doen. De grote dingen, doe het samen, maar laat nog wat vrijheid aan de andere organisaties. Maar alles hetzelfde doen is niet ok – IT moet dicht bij de diensten staan. Comply or explain, deel van de discussie maar vermoedelijk geen oplossing.

Modulair en re-use is op een aantal vlakken al sterk ingevuld. Wij hebben een aantal basisdiensten, vaak technische diensten. Wij hebben echter ook de ‘common build’, wat user en acces management is in applicaties – de toegansmodules – dat is altijd hetzelfde systeem. Voor de kosten, maar ook om algemeen probleem van fouten te vermijden. Technisch dus re-use. Daarnaast ook de rectificatie, wij zijn gestart met SOA, nu zouden we moeten gaan rectificeren en werken met micro-services. Die kunnen dan gebruikt worden voor het ontwikkelen van e-services. Eén van de grote problemen voor het hergebruik is het wettelijk kader: soortgelijke concepten worden telkens anders gedefinieerd. Wij hebben in het verleden al een aantal oefeningen gedaan. Dat waren telkens zware oefeningen. Het wordt heel lastig om hetzelfde te doen – het is een continu proces om de concepten te unificeren, maar er is geen visie om concepten te uniformiseren. Maar het is heel lastig, want de return on investment is laag. In de sociale zekerheid is het laaghangend fruit al geplukt, misschien anders binnen de FODs of de geografische data.

In verband met FEDICT: Het politieke niveau dat geen wil had is vooral belangrijk. SMALS deed het inderdaad goed, FOD Financiën ook, misschien is dat ook een reden. Wij hebben relatief snel succes geboekt met sociale fraudebestrijding. Dat werkte goed, de politiek kon er goed mee scoren, en dat heb je een basis voor de visie. Je moet ook zoeken naar het maatschappelijk punt en er dan naar beginnen zoeken. Je kan gewoon dingen doen die goed aanslaan, als de sociale partners tevreden zijn dan weegt het ook door tot bij de regering. Moest het anders zijn: geen SMALS, dan zouden ze wel beseffen dat het anders zou moeten. Er is onvoldoende belangstelling voor FEDICT om de aandacht te trekken.

Positie van SMALS als private organisatie: Privaatrecht is een noodzakelijke voorwaarde, maar nu begint het lastig te worden om aan te werven. Doorheen de verschillende wetgevingen kunnen wij op een specifieke manier samenwerken met de overheidsdiensten – “kosten de prijs en buiten de overheidsaanbestedingen om” (red: de kosten die gemaakt worden, worden volledig betaald door de organisatie die klant is – er is geen vaste prijsafsprake). We werken niet met een vaste prijs, want bij een vaste prijs merk je dat zodra het contract getekend is, de overheidsdienst er zoveel mogelijk wil

uithalen, maar de aannemer wil zo weinig mogelijk doen. Als het veel kost, dan gaan ze veel betalen. En dat maakt dat als we ergens keuzes maken we dat doen op een manier die het best werkt voor de verschillende organisaties. Op die manier kunnen we telkens het project afleveren. Dat is iets wat je in een andere context niet hebben – dat bevordert echt een partnerschap. Dat vraagt vertrouwen, maar dat vertrouwen is er ook – wij denigreren onszelf bijna. Als er iets kritisch is, dan gaan we dat soms ook gewoon slechter voorstellen dan het is – we gaan ons hard opstellen voor onszelf. We verbloemen niets. We zijn eerder pessimistisch.

Budget voor projecten: via imputaties, de verworven waarden berekenen enz. Als de klant ziet dat er problemen zijn, dan gaan we kijken naar de bijsturing die mogelijk enz.

E-services: via een AGILE manier van werken.

Te hoge kosten voor kleinere klanten: Kleinere klanten zijn moeilijk, want heel veel van onze processen zijn complex. De complexiteit die je moet aankunnen is heel hoog, je moet dus een nodig budget hebben, in een bepaalde omgeving enz. Er zijn dus organisaties die dat niet nodig hebben en die kunnen dat dus dan beter zelf gaan doen – dat is enkel als zij zo'n klein ding nodig hebben. Je kan het dan soms beter zelf gaan uitvoeren. Ze zeggen dat we duur zijn, maar dan komt de privé en dan lukt het niet. Mobiele toepassingen gingen we niet zelf doen, maar nu doen we het zelf want de anderen (red: andere privébedrijven) kunnen het dan niet. Wat je ziet is dat ze vaak moeten rekening gaan houden met andere zaken en dan loopt het soms toch wel fout. Vb. wij houden al lang van alle e-services een uniek dossier bij: Wij noteren welke gegevens we verwerken, voor wie enz. – dat is wat nu ook moet volgens de GDPR. Wij maken dat al in het verleden, maar het is duur.

Drie types leden ('A' – 'B' – 'C'): Dit zorgt voor een eerlijke verdeling van de winsten van SMALS.
