# Supplementary material
Source: MDPI journal article supplement (https://www.mdpi.com/2220-9964/6/9/282)
Supplement: s1 [file s1]

## Interview VVSG

**For more information about this interview, please contact Mr. Maxim Chantillon (KU Leuven Public Governance Institute – [maxim.chantillon@kuleuven.be](mailto:maxim.chantillon@kuleuven.be))**

VL: vroeger alle diensten verspreid, nu echter samengevoegd (vb AGIV, 1 dienstenintegrator) – misschien zou dit ook wel nuttig zijn op het federale niveau. (Fedict heeft reeds een aantal stappen gezet, misschien nog aantal nodig in de toekomst).

- 2 à 3 medewerkers voor data, ICT, geo
- Werkgroep: gewoon puur voor overleg – voorstellen ter voorbereiding van de GDI stuurgroep, maar deze is tegelijk ook minder aan het worden. Wij proberen standpunten te vinden, advies te geven, overleg te plegen. Weinig relatie tot het federale niveau.

Kadaster = enige federale bron die er echt toe doet. Bij veranderingen zullen gemeenten op hun achterste poten gaan staan. Vroeger was dat een zeer statisch gegeven, nu toch aan het veranderen. (basisgegevens zijn gratis, maar voor een update tijdens het jaar moet er betaald worden – dat gaat nu echter ook veranderen).

- Probleem op dit moment: hebben een eigen webdienst via dewelke we alle info krijgen (meestal wel 8 maanden te laat – data is soms 20 maanden oud...). Nu: veranderen → real-time update van de data. Maar Privacy commissie stelt nu dat we nood hebben aan een machtiging om de data te raadplegen (ook eentje die retroactief werkt)
- VL werkt aan een eigen systeem om de data te raadplegen (via MAGDA platform?) maar dat heeft eenzelfde probleem.
- De Machtiging: Kadaster zou willen dat Wallonië en Brussel ook volgen, maar dat is niet duidelijk of ze dat ook willen – uiteindelijk zullen ze wel moeten. Hoogstwaarschijnlijk dus wel betrekken.

NGI: nauwelijks enig contact – niet steeds duidelijk wat ze eigenlijk doen en welke producten ze hebben die de gemeenten kunnen verder helpen. Geen producten die relevant zijn voor hen. – stafkaarten worden niet gebruikt op het niveau van de gemeenten (niet gebruikt als referentiebestand)

- Begint sterk uit te weiden over de relatie tussen het Kadaster en het GRB – op lokaal niveau zijn de gemeenten verplicht het systeem te gebruiken. Maar wat betekent dat? Gemeenten beginnen nu thematisch info te linken aan het GRB maar tegelijk problemen in relatie tot het kadaster. Grotendeels verloopt dit automatisch maar het nazicht moet manueel gebeuren → vraagt veel manuren + probleem van het up-to-date houden.
- Gemeenten willen ook graag mee beheerder worden van het Kadaster – wij zijn de eersten die het zien en gebruiken.

Kadaster is heel moeilijk om mee te communiceren:

- Concrete projecten lukt het wel – na een tijdje kennen we de juiste contactpersonen daar dan wel. Maar niet concreet: veel moeilijker.
- Geen terugkeer moment met hen voorzien.
- Wel op hoogste niveau maar daar worden onze issues niet altijd in detail besproken.

BeStAd case: wel een aantal andere federale partners betrokken (buiten het Kadaster): Kadaster zelf, NGI, KBO etc. NGI heeft echter een onduidelijke rol: is er daar een link naar de politie en het ASTRID netwerk?

Ontwikkeling van e-services: het is aan de centrale overheid om de meest basis e-services te ontwikkelen. Centrale overheid moet meer centraal nadenken. Op VL niveau: MAGDA platform ontwikkeld (= goede manier om te werken). Nood aan 1 toegangsweg – alle diensten centraal stellen en aanbieden. = beschikbaar stellen + overzichtelijk maken. = alles centraliseren.

MAGDA platform: heel wat federale informatie is daar reeds beschikbaar (KBO, Rijksregister, Kadaster) – verloopt volledig via VL – wel via federale overheid de informatie verkregen.

Visietekst/missietekst/doelstellingen: niet echt – heel vaak inspelen op de realiteit – wel vaak concepten die worden gelanceerd door onze leden en daar dan op verder werken. Objectieven: altijd sterk gelinkt aan wat VL doet (ook al proberen we dat te vermijden en zeggen we dat we dat niet zo willen doen). Probleem: gemeenten hebben vaak te weinig aandacht voor GIS en data. Ze zien

Netwerk – hiërarchie – markt:

- VL: wil in theorie op een netwerk manier met ons omgaan en ons volledig gelijkwaardig behandelen, maar in realiteit is het vaak helemaal anders.
- Hiërarchie is heel sterk aanwezig – lokaal bestuur is al te vaak te weinig betrokken, ondanks de grote rol die ze wel hebben.
- Heel weinig betrokken op het federale niveau.
- Maar toch ook belangrijk dat er een algemene structuur voor handen is want autonomie maakt ook dat er heel veel verschillen zijn. Data en e-gov hebben nood aan een eigen structuur: te veel concepten, VL maakt zich daar nu bewust over – ze gaan duidelijke pakketten aanbieden. = zelfde structuur is goed!
- Zelfde bouwstenen voor vb. authenticatiedienst of voor authentieke benamingen. = niet alles zelf uitvinden + communicatie zou daardoor sterk verbeteren.
- Probleem: VL staat verder (dan gemeenten en federale overheid)

Zeer problematisch: VL dwingt lokale besturen om mee te werken maar het federale niveau is niet betrokken.

- Vb. Rijksregister of Kadaster: vaak niet mee met wat er tussen VL en lokaal niveau gebeurd.
- Vb. gebouwenregister (binnen de basis georegistratie: CRAB, gebouwenregister, KLIP, wegenregister): focus op de gebouwen en niet op adres (adres is slechts een teken maar kan veranderen – het gebouw is de realiteit). Gebouw is echter gekoppeld aan eigenaar = rijksregister → moeilijk om link te leggen = probleem.
- Voor BeStAd: zelfde probleem maar daar hebben ze nu een akkoord gesloten. Tegen 2018 zullen de gewestelijke adressen als basis gebruikt worden. Dit zou ook voor gebouwenregistratie zo moeten.
- Is dit een politiek probleem? Nee het is eerder financieel bij zo'n problemen of gekoppeld aan werkuren/middelen. Idee om federale overheid pas in 2<sup>de</sup> instantie te betrekken bij zo'n projecten terwijl dat eigenlijk vanaf het begin moet gebeuren.

Andere thema's met geocomponent waar aandacht voor is op lokaal niveau? Volksgezondheid?: nee, geen aandacht voor. Maar vragen aan Herman.

Lokale overheden als toeleveranciers van data aan de federale overheden:

- Vb. alle info uit het Rijksregister komt van de lokale overheden.
- Vb. kadaster: “uniek percelenplan”
- Probleem: iedereen heeft een hoop data maar die wordt niet steeds doorgegeven.

Private sector spelers:

- Kaartenmakers voor de gemeenten – externe bedrijven inventarissen op geo manier de verschillende aspecten van de gemeente.
- Software ontwikkelaars en leveranciers.

Meest gebruikte datasets:

- VL heeft daarover normaal wel informatie – kunnen dit zien via de meest gedownloade info die ze ter beschikking hebben.
- Op federaal niveau: kadaster kaarten en leggers. Daarnaast ook de statistieken die vaak worden gebruikt, maar daar is vaak geen geo-element aanwezig of enkel op een impliciete manier.
- Probleem: vindbaarheid van de data op het federale niveau = ontwikkeling van een nationaal platform zou hiervoor een goede zaak zijn. (al vaak gezegd maar nog nooit van de grond gekomen):
  - o Zou de vindbaarheid verhogen

- Zou het mogelijk maken om de data te updaten op een constante manier waarbij vermeden moet worden dat de lokale overheden de data steeds opnieuw downloaden en invoeren in hun eigen systemen. Waarom? Software problemen – maar ook kosten aan manuren, heel weinig gemeenten die de data op een rechtstreekse manier via de e-services gebruiken.

Mogelijke case study: kadaster relaties:

- Kadaster systeem voor de lokale overheden: URBAIN: gebruikt om de info te downloaden – steeds te laat – meestal pas na 8 maanden voor dat jaar. In slechtste geval is de data 20 maanden oud.
- Via dit URBAIN platform kunnen de lokale overheden ook hun vergunningen en toelatingen uploaden en doorsturen aan de overheid.
- Op VL niveau: ook upload mogelijk voor een aantal zaken maar in de toekomst vooral een eigen systeem om informatie te downloaden (real-time informatie) die zal aangeleverd worden door de federale overheid. = verloopt via de Vlaamse Dienstenintegrator.

Relaties met FEDICT: vragen – vb. houding ten aanzien van eHealth (daar was er een betrokkenheid maar niet duidelijk hoe)
