# Supplementary material
Source: MDPI journal article supplement (https://www.mdpi.com/2220-9964/6/9/282)
Supplement: s1 [file s1]

## Interview FPS Economy

**For more information about this interview, please contact Mr. Maxim Chantillon (KU Leuven Public Governance Institute – [maxim.chantillon@kuleuven.be](mailto:maxim.chantillon@kuleuven.be))**

Ontmoeting met statistiek afdeling van FOD Economie – cruciale functie in samenbrengen van verschillende datasets: datasets van verschillende overheden worden verzameld, daarna bewerkt (vaak met een geo component, wordt er ook vaak aan toegevoegd). Daarna terug verdeeld onder de verschillende instellingen die er gebruik van kunnen maken (met respect voor geheim van de statistiek, privacy etc.).

Weinig algemene visie op het gebruik van geo. Eerder algemene focus op Big Data en Open Data. E-services lijken weinig of geen aandacht te krijgen. FOD Economie – statistiek lijkt weinig initiatief te nemen dat tot innovatie en verandering kan leiden.

Uitdagingen: coördinatie, middelen.

### **Open Data belang:**

- Sinds december 2015 is er data beschikbaar via het platform Open Data van de FOD Economie – belangrijk: een zeer klassieke website. Geen e-service (data is in 2 formaten beschikbaar).
- FEDICT geen noemenswaardige rol gespeeld – enkel beperkt geconsulteerd aan begin van de procedure voor opstart van open data – website is wel opgenomen in de catalogus van FEDICT.
- Visie binnen FOD Econ bestaat: sterke ondersteuning van de open data. Geen 100% coördinatie tussen de verschillende directies binnen de FOD Econ maar wel algemene aanvaarding van het principe
- Aldus: verschillende visie van het NGI (dat nog steeds zelf-financierend moet zijn).

### **Systemen tussen de verschillende gewesten:**

- Vlaams niveau: CRAB
- Brussel: URBIS
- Wallonië: nog niets maar ze zullen wel met iets komen
- Maar: geen coördinatie op het federale niveau → wij hadden gehoopt dat NGI een coördinerende rol zou spelen, maar gebeurt niet echt. Wij worden ook niet echt geconsulteerd. Er is nood aan meer consultatie.

### **e-services:**

- Weinig activiteit binnen de FOD Economie → enkel voor intern gebruiken zijn er een aantal zaken die kunnen gebruikt worden.

### **INSPIRE compliant worden:**

- Nood aan meer coördinatie op het niveau van de gewesten → NGI moest dit gedaan hebben maar gebeurt niet voldoende.
- Probleem binnen de FOD Econ:
  - o om INSPIRE compliant te zijn is er nood aan een “geoserver”: maar die is er op dit moment niet.
  - o Rol NGI: Wij hebben daar de kennis niet voor en dit zou via het NGI moeten verlopen. Indien dit systeem zou kunnen werken dan zou de eigen Archis systeem niet meer nodig zijn.
  - o FOD Econ is gaan kijken hoe Brussels Gewest dit aangepakt heeft: zij hebben iemand die voor hen werkt (= external consultant van GIM) en die de systemen beheert. Maar dat kunnen wij niet aan, dan moeten er allerlei zaken gewijzigd worden en dat gaan niet. Daarom is het belangrijk dat het NGI deze rol neemt (hopelijk niet betalend)

### **Relaties met de federale overheidsdiensten:**

- NGI:

- Op papier is er tussen FOD Econ, Kadaster en NGI een akkoord voor de verdeling van data en het doorgeven ervan. Maar in realiteit nooit echt uitgevoerd.
- Wij hebben verschillende visie op het vlak van open data, maar voor de rest is de relatie goed en verloopt het uitwisselen van de data vlot.
- Ook voor INSPIRE samenwerking met hen.
- TomTom: vroeger gebruikte de stafkaarten van het NGI (nu enkel nog gebruikt om iets na te kijken, als een vorm van archief), dan overgegaan op een systeem waarbij TeleAtlas (geleverd door Realdolmen) werd gebruikt. Nu gebruiken ze het TomTom systeem zoals aangekocht door het NGI.
  - Echter: systeem niet up to date op automatische wijze
  - Nu terug aanvragen bij NGI om kaarten te updaten.
- Kadaster:
  - Geeft informatie door aan ons: vooral adresgegevens, wij hebben geen nood aan de perceelinformatie (daardoor ook geen problemen met het GRB bijvoorbeeld)
  - Belangrijkste partner op het federale niveau.
  - Op het vlak van INSPIRE ook samenwerking met hen.
- Andere federale overheidsdiensten en gewesten/gemeenschappen:
  - ook contacten maar dan voor andere datasets die we van hen krijgen en onder hen verdelen
  - vaak is er in de dataset een geo component aanwezig, maar wij proberen er toch nog een meer precieze aan toe te voegen: vb. x-y coördinaten.
  - Algemeen: nooit problemen met het ontvangen en doorgeven van de data, er zijn procedures en regels voor en die werken. Problemen zijn eerder de uitzondering.
- Algemene relaties met VL, BR en WAL: goed, we hebben mooie contacten. We nemen deel aan hun activiteiten om op de hoogte te blijven en zitten in werkgroepen.

#### **Belang van het “geheim van de statistiek”:**

- er is een heel groot aantal datasets publiek beschikbaar, maar een groot deel ook niet.
- Zelfs binnen de eigen FOD bepaalde informatie niet doorgeven.
- Waarom? Mensen moeten vertrouwen hebben en daardoor kunnen we bepaalde informatie niet doorgeven.
- Gevolg: sociale fraude, financiën, taks controle enz. is een zeer gevoelig thema waarbij het moeilijk is om data door te geven.

#### **Middelen binnen FOD Econ – statistiek**

- Benadrukken de subjectiviteit van zo’n beoordeling
- Echter: beide zijn het erover eens dat het meer en meer een overlevingsstrategie aan het worden is. Daardoor is ondermeer geo meer en meer naar het achterplan geschoven – het zit nog in strategieën maar er kan nog maar weinig aan innovatie gedaan worden.
- Eerder een strategie van het volhouden aan het worden – groot probleem hierbij is het op peil houden van de informatie.

#### **Werking FOD Econ**

- Sterk versnipperd: opgedeeld in aantal directies die schijnbaar een grote zelfstandigheid bezitten en slechts een naam delen (alook een gemeenschappelijke ICT dienst)
- Directie statistiek (althans respondenten) waren niet in staat om één e-service te noemen die niet aan hun directie is gekoppeld.
- Daarnaast: ICT moet onderhandelen over de INSPIRE implementatie, maar alle anderen zijn daar wel bij betrokken (en vb. Directie Statistiek gaat zelf bij Brussels Gewest kijken hoe zij werken) = ontbreekt aan middelen.
