# Supplementary material
Source: MDPI journal article supplement (https://www.mdpi.com/2220-9964/6/9/282)
Supplement: s1 [file s1]

### Interview –European Commission – DG CONNECT – Person 3

**For more information about this interview, please contact Mr. Maxim Chantillon (KU Leuven Public Governance Institute – [maxim.chantillon@kuleuven.be](mailto:maxim.chantillon@kuleuven.be))**

Open standaarden gebruiken zou ons al veel verder kunnen leiden. Er zijn heel veel standaarden, maar binnen de geowetenschappen zijn bepaalde standaarden die erg nuttig kunnen zijn voor ons. Ik denk dat er veel mogelijk is, ook hier binnen de Smart Cities. Ook om de data samen te brengen, maar de voorwaarde is de infrastructuur.

Ik ben altijd bezig geweest met infrastructuur, de voorwaarde om data uit te wisselen. En wat ik weet van de Unit, dat is dat het een samenvoeging is van twee Units: Mobility enerzijds en Smart Cities anderzijds. De DG heeft zich altijd met Smart Cities beziggehouden, en we zien dat dat nu ook het geval aan het worden is. Zij proberen nu alles te overstijgen, en te focussen op een horizontale benadering: energie, mobiliteit enzo. We doen dat via het EIP. Dat zijn drie DGs die proberen samen te werken, maar het is niet eenvoudig, want je kan niet transversaal en horizontaal werken als je alleen maar verticaal verantwoording moet afleggen. Het is te hiërarchisch en dat is ten doden opgeschreven. Maar doordat we samenwerken verloopt het trager, en is ook geen echt sexy topic. Maar de politiek heeft er niet echt interesse in.

Op dit moment is er in de Unit smart Mobility en Living een heel sterke focus op smart mobility, omwille van de self-driving cars die op dit moment ontwikkeld worden. Die auto's zijn er al, maar we moeten de auto's nu dus ondersteunen en cross-border laten doen. Probleem is dat alle landen hun eigen werkwijze hebben. Een vrij verkeer van data en telecomverkeer is bijvoorbeeld niet geheel mogelijk, want ik kan niet langer dan twee maanden gebruik maken van de roamingcapaciteit. Je kunt dus niet spreken van een digital information society, want er zijn nog erg veel grenzen. Er zijn nog heel veel jaren nodig als ze echt willen samenwerken.

Internetprotocol bestaat en infrastructuur is volledig gestandaardiseerd. Dus die standaarden bestaan. Daar hebben we 50 jaar over gedaan, sinds het begin van het computertijdperk. Je krijgt nu allerlei standaarden op het gebied van roaming enzo. Je hebt bijvoorbeeld eduroam. Het kan dus effectief, maar dan moet je van onderaan beginnen en daar gaan kijken. Surfnets, de UK, de Duitsers en de Belgen hebben daar een erg belangrijke rol in gespeeld. Als je weet dat de wetenschap enkel nuttig is voor de hele wereld als die beschikbaar is, dan moet je samenwerken en het is op die basis dat de ontwikkelingen gebeurd zijn. Je moet dus gaan samenwerken. JEAN infrastructuur en Eduroams zou een goede case zijn.

Wij doen vooral research, ICT research. De policies die ontwikkeld worden zijn geen directives, geen regulering, wij komen meestal niet verder dan een communicatie. Dat gaat het probleem dan duiden, en die analyse van het probleem en doet voorstellen voor de oplossing. Projecten lopen dan via H2020, maar we zitten nu de discussie te voeren over het MFF want de UK gaat niet meer bijdragen, en de anderen willen ook niet meer gaan bijdragen. De administratie is nu aan het vechten om het geld. Wij maken 7 jaren plannen en dat is een groot probleem. We geven bepaalde richtingen aan.

Smart city is alles wat je doet om een stad aangenamer te maken en om bureaucratie tegen te gaan, e-government is daar een onderdeel van. Er zijn 100-duizenden zaken die we op die manier kunnen implementeren. We hebben bijvoorbeeld een 'humble-landposts' (= straatverlichting, lantaarnpalen): die moeten vervangen worden, want die zijn goedkoper. We kunnen ze vervangen, één deel van de administratie doet dat. Doe meer dan dat echter, een andere dienst is bezig met luchtvervuiling. Een andere is bezig met het verkeer, ICT is bezig met het installeren van connect-points voor WiFi. Al die dingen kun je integreren in lantaarnpalen. We zeggen niet enkel dat er moet samengewerkt worden, maar we kunnen ook gaan samenwerken om de kosten dan ook nog eens te bundelen in de hele EU. Maar dat is erg moeilijk, want iedereen zit op een ander moment. Ze luisteren niet naar elkaar, want ze moeten altijd al samenwerken en ze willen dat historisch gezien niet doen. Selectie gebeurt op basis van een werkprogramma, er is per jaar tussen de 10 en 100 miljoen euro beschikbaar. Dat wordt gemaakt door een afdeling die daarvoor deskundigen uitnodigt, ze gaan dan brainstormen en rekening

houden met de vroegere acties en de interesses van het moment. Die worden dan omschreven en in een werkprogramma vastgelegd. In het werkprogramma staan dan teksten waarvoor je oproept om voorstellen in te dienen. Op basis daarvan gebeurt er dan een selectie, onafhankelijke experts zullen dan beoordelen en kiezen. Vooral grote steden doen mee, zij hebben meer werknemers. De kleintjes doen weinig mee. We zijn nu nog niet zover dat we met kleine steden bezig zijn. Individuele projecten zullen stranden, zowel voor de grote als de kleine steden. Ze moeten dus wel gaan samenwerken.

Bepaalde lidstaten hebben erg veel interesse. Vooral uit Nederland, Engeland en Spanje. Spanje maakt gebruik van de structurele fondsen, en zij hebben het geld voor de roads al opgemaakt en ze kunnen nu dus investeren in Smart Cities. UK is een grote speler. Oost-Europa doet het heel slecht, geen interesse. Estland is nummer één op het vlak van infrastructuur, Denemarken is nummer één op het vlak van digitalisering, maar doet vooral groene projecten – ook smart city, maar niet onze winkel. Denemarken heeft de grootste windmolen capaciteit, beste technologie, ook erg bezig met energieneutraliteit. Het valt dus niet zoveel op, want Denemarken doet het al veel jaren en dus doen ze niet mee. Spanje wil nu een inhaalbeweging maken. Nederland heeft het poldermodel, en dat maakt dat ze willen samenwerken.

Is er interesse voor waar jullie mee bezig zijn vanuit België? AGORIA is een goed voorbeeld en hun boekje over smart cities is erg goed, dat geeft het probleem erg goed weer.

De omslag naar smart cities, en ik kijk dan naar Nederland, is mogelijk. Je ziet nu dat de grote steden een beroep doen op de hogere overheid en het is aan de hogere overheid om dat samen te gaan werken met de lagere overheden. Het is zowel top-down als bottom-up en de commissie heeft daar een erg belangrijke rol in te spelen. Ze kan dingen voor mekaar krijgen omdat de Member States allemaal peers zijn, en de Commissie staat daar ergens boven of naast en dat helpt om de MS te doen samenwerken. Zeker als we kunnen aantonen dat het geld kan opleveren. En dat kan een erg belangrijke motivatie zijn.

De link tussen de Commissie en de lokale overheden kan gemaakt worden via DG Regio en via onze projecten. DG Regio kan dan een invloed gaan hebben op de regio's via de Urban Agenda. Eigenlijk zie je dat alle in verschillende levels gebeurt, er is het research niveau. Maar ook op het implementatie niveau door samenwerking tussen regio's en landen. Je moet op alle niveaus gaan werken.

De rol van de LS: de representations krijgen instructies van de administraties. Heel veel wordt aangestuurd vanuit de Commissie, dan bespreken bij de LS in de Council en Parlement. Het lobbyen is heel moeilijk, want het is een heel erg holistisch en vaag begrip. Als Nederland nu een specifieke vraag heeft, dan kunnen ze dat zo gaan doen. Maar je krijgt nu wel lobbying op bepaalde andere onderdelen, die veel eenvoudiger zijn. Vb. quantum computing enzo. De onderwerpen zijn te vaag en niet grijpbaar.

Lyon is een erg goed voorbeeld van een Smart City.

Burger participatie is iets wat vooral via het lokaal niveau moet verlopen, daar kunnen wij geen rol in spelen.

Het grote risico van digitalisering is dat je meer problemen creëert dan dat je er oplost. Er moet een duidelijke omschrijving zijn waarom het nodig is om te digitaliseren. Je moet heel duidelijk weten waarom je het doet.

Privacy: echt een groot probleem dat dient opgelost te worden. Daar moeten we rekening mee houden. GDPR, ja dat is een Regulation, geen Directive hoor. De MS moeten dat nog omzetten, en tegen dan is het al zwaar afgezwakt.

Er is samenwerking met Eurocities, zij zitten in lighthouse projecten en de frameworks die wij uitwerken. Meer informatie heb ik echter niet.

BELNET spreken, zij hebben één netwerk en waarom werken zij samen? Hoe werken zij samen?
