# Supplementary material
Source: MDPI journal article supplement (https://www.mdpi.com/2220-9964/6/9/282)
Supplement: s1 [file s1]

## Interview Royal Observatory of Belgium

For more information about this interview, please contact Mr. Maxim Chantillon (KU Leuven Public Governance Institute – [maxim.chantillon@kuleuven.be](mailto:maxim.chantillon@kuleuven.be))

### **Structuur van de organisatie - verschillende afdelingen:**

- Aardrotatie: ze nemen deel aan heel veel projecten en missies. Er zijn meer mogelijkheden om zo geld te ontvangen, nu ook een ERC project – de gsp is nog steeds bij dit departement, maar ze zouden beter bij de seismologie zitten.
- Seimologie & gravotologie (gravimetrie): de mensen verwachten meer en meer een antwoord, zo snel mogelijk. De aardbeving in luik was rond 3u, maar voor 5.30 was er niets op de radio of tv. Op de sterrenwacht was er niemand, de directeur moest het 's morgens dan maar vertellen. Wij konden niets doen. Wij zijn vooral bezig met het gewicht van de aarde → belangrijkste voor de communicatie met het publiek.
  - o Laatste aardbeving: ontploffing op de kaaïen in Antwerpen – wij moeten dan uitklaren van waar de trillingen komen – wij brengen dan een bericht.
  - o 2008-2010: aarbevingszwerm in Court-Saint-Etienne: sommigen werden gevoelt, maar sommigen zijn ook gehoord. Maar dat kunnen wij niet altijd verklaren. Door het aantal mensen dat op onze website kwam, werden we gealerteerd om na te gaan wat er gebeurd was = “Did you feel it-enquete” → mensen konden onmiddellijk gewaarschuwd worden.
  - o Twee jaar geleden: aardbeving in Folkstone – gevoeld tot aan onze Belgische kust.
  - o Wij hebben echter geen wachtdienst: maar wij zijn allemaal verantwoordelijk voor onze job, maar soms lukt het niet en zijn alle wetenschappers op zending en dan zijn we niet ter plaatse.
  - o Via de moderne technologie lukt het nu wel om contacten te leggen.
- Astrofysica – cartografie van de hemel: begonnen met de Grieken. Met behulp van de wetenschap, we nemen deel aan projecten.
- Zonnefysica: space weather onderzoek uitvoeren – bekijken hoe het zonneweer een invloed heeft op de communicatie op aarde. Zo kan het nodige gedaan worden op aarde wanneer nodig, ze nemen ook deel aan ruimtevaartmissies. Ze spelen een rol bij het waarnemen van de zonnevlekken. De International Database voor de Zonnevlekken staat in Brussel – zeer mooi dus. Via Galileo project. Zonneklimaat is belangrijk voor het klimaat hier bij ons op aarde. Soms is er een probleem met het IT systeem, dan kunnen we niet meer werken – dat zijn we nu technisch aan het oplossen – we zullen een back-up systeem bij BelNet hebben. Maar tot nu toe viel onze info soms uit, dan hebben we ook geen data. Maar via de 4G kunnen we via facebook en twitter nog werken.

Er is ook een crisislijn tussen de sterrenwacht en het crisiscentrum – om de 300 jaar is er toch een zware aardbeving, en dan moeten we de autoriteiten snel kunnen werken – probleem: er is geen communicatie mogelijk met het epicentrum. Wij moeten dat snel kunnen communiceren naar de overheidsdiensten. Zelfs na een kleine aardbeving zonder veel schade willen we zo snel mogelijk correcte informatie verschaffen. “Did-you-feel-it-enquete”.

Dat zijn de belangrijkste contactpunten met de burgers en bedrijven. VITO voert nu testen uit voor geothermie, via het water warmte ophalen. Wij bekijken nu hoe ze aardbevingen gaan veroorzaken, indien dit het geval is dan moet het toch wel juist om burgers en bedrijven de juiste informatie te geven. Maar daar liggen ook kernproducten, niet echt een goed idee dus. De regio's doen de ondergrond, wij doen de bovengrond. Maar dat is dus wel een probleem – wij werken samen, maar coördinatie is niet altijd even goed (vb. VITO anders bericht op facebook, verschillend van gemeenschappelijke communicatie → zorgde voor wrevel).

Dienstverlening aan de burgers en andere overheden: er is niet echt nood aan een e-service, soms nemen ze beter gewoon rechtstreeks contact op. Wij hebben vooral telefonisch contact met hen. We kennen het aantal bezoekers, maar wat doen ze met onze info op onze website.

Er bestaan apps voor het aangeven van aardbevingen, maar wij hebben dat niet. De mensen moeten een app op hun gsm zetten maar die kan binnen één, twee, drie jaar niet gebruikt worden. Dat is ook een kost voor ons, dat is al moeilijk genoeg voor ons en we moeten onze website ook al onderhouden. Ik kijk alle dagen naar bepaalde apps, vb. KMI app. Maar het is wel mogelijk om de seismometer van de mensen als gsm te gebruiken. En dat is nu een project in Californië, zij testen de mogelijkheid om de gsm te gebruiken als seismometers. Zo kunnen ze de versnelling van de aardbodem meten. Het kan dat we dergelijke dingen uitvoeren. De Did-You-Feel-App werkt niet voor hen.

#### **Zou het niet nuttig zijn om mee aan Be-Alert te werken?**

Wel, ze contacteren elkaar nooit in België. Er is geen aandacht voor ons en de Sterrenwacht, maar wij doen wel de testen voor de kerncentrales, de CEVESO bedrijven, het opslaan van de kernafval enzo. Maar nee, we zijn niet gecontacteerd voor Be-Alert. Zelfs met het crisiscentrum is het moeilijk communiceren.

We hebben eens gewerkt met Buitenlandse Zaken in verband met de aardbevingen die overal inde wereld plaatsvinden, maar meestal niet veel samenwerken. We doen zoveel mogelijk om in contact te komen met de bevolking.

#### **Wat is de leeftijdscategorie van jullie publiek?**

De mensen die bellen zijn vooral boven de 50, mensen die niet de reflectie hebben om op internet te kijken bellen he. Sinds '32 sturen we steeds een enquête op naar de gemeenten, wij zijn daartoe verplicht. Maar dat wordt minder en minder van belang, omwille van het Did-You-Feel-it systeem. We werken daarvoor samen met de Universiteit van Keulen, die gebruiken ook onze servers. Zo kunnen we de gevolgen van de aardbevingen goed in kaart brengen, zonder de grenzen daarbij in kaart te moeten brengen.

Ons werk is niet altijd even interessant voor de burgers.

#### **Wie zorgt voor de IT?**

Wij ontwikkelen de website intern, maar we hebben geen ander contact dan BelNet. Wij doen dat eigenlijk zelf. Facebook pagina is ook iets wat we intern doen, dat is via onze communicatiedienst – zij heeft een facebookpagina ontwikkeld. Probleem is wel de vertaling, soms schrijven we het zelf in de andere taal. Maar het moet in beide talen zijn. Gelukkig is er nu facebook dat het zelf vertaald. Vooral dan ook nog naar het DE is moeilijk. BelNet is enkel voor de infrastructuur, zij zorgen voor de servers enzo en wij betalen dan.

Geen samenwerking met FEDICT: “wat is dat?”.

Zelfs met het crisiscentrum verloopt de communicatie moeilijk. Voor het Space Weather was er een speciale dienst opgericht, maar het antwoord van de regering was dat er geen aardbeving is in België en er is dan ook geen aandacht voor ons.

Over de jaren is er echter wel een verandering geweest. Er is aandacht voor het seismische, architecten hebben aandacht, VITO, verzekeringen, de gewesten. Er veranderen dingen. Misschien wel door al het werk dat we doen. Al die aardbevingen, enzo. Als er eentje is, dan komen de media bij ons terecht. Soms zijn er mensen die ons een slechte naam geven, soms hebben de media meer aandacht gehad voor de universiteiten, maar nu hebben we jonge collega's die kunnen enthousiasmeren.

Een paar weken geleden waren de IT systemen uitgevallen, wij hebben dan het crisiscentrum opgebeld maar er is totaal geen interesse.

#### **Met wie hebben jullie de meeste contacten?**

BELSPO, maar ja, hoe lang gaat het nog bestaan. VITO heeft daar allemaal testen gedaan, wij hebben de Staatssecretaris geïnformeerd maar we wachten nog steeds op een antwoord. Maar echt veel contacten zijn er niet.

Met het Waals gewest loopt het beter. Wij hebben een meetstation en dat is eigendom van het Waals gewest, in Eupen, en daar hebben we erg goede contacten.

We werken veel met universiteiten.

Meer en meer met het NGI. Vroeger deden we zwaartekracht metingen, maar dat deden ze dan niet meer. Wij hebben contact via dit project, Ingrid speelt een belangrijke rol.

Daarnaast ook met het KMI en BIRA. We moeten meer gaan samenwerken voor IT, maar de staatssecretaris wil eigenlijk alles samenvoegen.

BELSPO gaat echter onze data wel delen.

Crisiscentrum: nee, maar we hebben wel een telefoonnummer.

We worden eigenlijk nooit gevraagd, we worden nooit echt aangemoedigd. Dat is een vorm van amateurisme.

Vb. Buitenlandse Zaken stuurt Be-Fast naar Tibet. Ze hebben ons nooit gecontacteerd, en toch werken we gratis. Er is geen interesse en we bestaan niet.

### **Invloed van INSPIRE**

INSPIRE heeft geen invloed op ons werk en dat vraagt heel veel werk, het is zeer technisch. Wij hebben niet de nodige capaciteit om dit te verwerken. Het NGI werkt nu ook met de KU Leuven. Beetje bij beetje gaan we verder, ook voor het NGI. Geen invloed op de algemene werking.

Uur is wel belangrijk, een nauwkeurige elektronische tijd. Dat is een belangrijke dienst. Dat is erg technisch, dat is op het meteorologische service. Op de Sterrenwacht zijn er twee belangrijke diensten: het weer en seismologie.

### **Is er voldoende aandacht voor online diensten en digitalisering binnen de federale overheid?**

Data van vroeger is iets wat de mensen meer en meer komen vragen. Ze hebben graag de oude seismogrammen bekeken met de huidige modellen, natuurlijk zou ik erg tevreden zijn als ze onze diensten zouden digitaliseren. Ze hebben heel mooie foto's van de hemel van een jaar geleden, en dat is nuttig voor het berekenen van de beweging van de Galaxy. Als er geld over is, dan proberen we daarin te investeren. We namen contact met de Albertina, maar zij hebben ons laten weten dat er geen tijd was voor ons. Ons archief is in een slechte staat, officieel is er een aanmoediging van de staat en overheid maar er is niet voldoende budget.

### **FOD BOSA**

Nooit van gehoord, weet niet wat het is. Maar misschien kennen de collega's het. BELSPO zal verdwijnen, en wij zullen naar de FOD Economie gaan. Maar dat is iets dat heel vaak voorkomt.

### **Open Data Beleid**

Je zal niet alle data kunnen vinden, maar van sommige meetstations staat de data online. Wij sturen onze data, van een aantal stations op naar het ORFEUS station. Wij zouden meer kunnen opsturen, maar de data moet ook in orde zijn. In de theorie is alles in orde. Sommigen vragen de data, maar probeer die data maar allemaal eens te lezen. Maar de data is beschikbaar. De data van verschillende stations in beschikbaar, maar in praktijk is dat niet altijd even eenvoudig. Maar dat is niet zoals bij het KMI: zij hebben de temperatuur, infrarood enz. Mensen willen de temperatuur weten.

Artikel (zal het opsturen): geothermie, ja, en dan moeten we daarrond een meetstation hebben. Maar de industriële procedures zijn een probleem: via de data kan je heel veel leren. De concurrent kan dus ook informatie krijgen die het bedrijf liever niet wil delen. Daarnaast zullen de mensen de data op een bepaalde mensen interpreteren, en vb. gebruik maken voor de data voor het NIMBY syndroom te staven. Met data kan je veel verhaal maken, zeker als je er niets van kent. Open data, ja, maar we moeten er misschien toch wel wat beter op nadenken.

### **Enquetes op de website**

Neen, we zouden dat echter wel kunnen doen op onze website van de Sterrenwacht – de communicatiedienst zou dat wel kunnen doen.

### **Contact met burgers**

We werken veel per telefoon, maar ook per mail. Ze vullen misschien een online formulier in. Maar tegelijk misschien niet nuttig om naar een hoger systeem te gaan.

Lieten het Layne & Lee model zien – het hoogste niveau is niet bereikt. Er zijn verschillende manieren om te kunnen communiceren.

**Did-you-feel-it – gebruikt door veel mensen?**

Dat is een groot succes, mensen zijn blij en ze schrijven meer dan ze moeten schrijven. Veel mensen geven het adres, terwijl enkel de postcode gevraagd wordt. Mensen gaan echt spontaan naar de systemen kijken. Bijvoorbeeld in Cour-Saint-Etienne hebben veel mensen dat gedaan.

**Gaan jullie de informatie ook terug bezorgen aan de mensen?**

We krijgen meer bezoekers op onze website. Soms contacteren we de mensen dan nog terug achteraf, maar meestal niet.

**Financiële middelen**

Minder en minder financiële middelen – ik heb twee mensen verloren, bijvoorbeeld de persoon die werkte voor de Did-you-feel-it app. Dat is echt een probleem, dat is snijden in de digitalisering. Als er nieuwe prioriteiten kwamen wordt het personeel naar daar verschoven. We kunnen daardoor moeilijker nieuwe zaken ontwikkelen, wij zijn in staat om te werken – zeker wat de IT infrastructuur betreft, via BelNet – maar het geeft problemen om ons meetnet te onderhouden. Wij willen twee nieuwe apparaten kopen, maar dat kost geld en ik ben niet zeker dat wij het geld zullen vinden.

Wij waren de pioniers voor de Did-you-feel-it app. We hadden vroeger 6000 antwoorden, we waren de eersten in Europa om daar op te werken. We hadden het systeem in vier talen (ENG – FR – NL – DE). We hopen dat we dat kunnen verderzetten.

Daarom zou het interessant zijn om te gaan werken met de gsm resultaten: zo niet enkel de seismologische activiteit waarnemen, maar ook de afstand van de locatie.

Map: ESRI is standaard, maar er is de mogelijkheid om via Google te gaan kijken waar de personen zich bevinden en ook de NGI is beschikbaar.

Maar: het valt op dat er meer en meer interesse is voor de seismologie – vb. Belga belt ons nu iedereen jaar om te vragen wat de seismologische activiteit van het jaar voordien was. En soms communiceren we ook op een simpele manier: vb. wanneer er een match is, dan communiceren we over de seismische activiteit. En zo zorgen we ervoor dat de mensen ook weten wat wij doen, en zo weten ze ook wat onze rol is als er iets ernstig gebeurt.
