# Supplementary material
Source: MDPI journal article supplement (https://www.mdpi.com/2220-9964/6/9/282)
Supplement: s1 [file s1]

## Interview FEDICT

**For more information about this interview, please contact Mr. Maxim Chantillon (KU Leuven Public Governance Institute – [maxim.chantillon@kuleuven.be](mailto:maxim.chantillon@kuleuven.be))**

### **Algemeen te onthouden:**

Legt focus zeer sterk op het niveau van gewesten – gewesten bezitten het gros van de geospatiale data (= klassieke versie). Studie rond de rol van de federale overheid dient dan ook vooral te liggen op de relatie tussen enerzijds de federale overheid en anderzijds de regionale/gewestelijke overheden. Doctoraat Lies Van Cauter: bevindingen waarom relatie tussen Vlaams niveau en lokale niveau zo moeilijk loopt zijn zeker ook geldig voor het federale niveau. Benadrukte steeds het belang van de subsidiariteit: de gewesten hebben de eigen bevoegdheden en dienen daar aan te voldoen. FEDICT heeft er ook, maar veel minder gebonden aan de geografische elementen – dat is de rol van het NGI. Opvallend: weinig aandacht tijdens gesprek voor het bestaan van andere data dan de puur klassieke geografische data zoals deze bekend is van kadaster, adressen etc.

### **Specifieke info:**

BeSt Ad: Federale overheid = heel vaak geen eigenaar van de gegevens maar slechts een beheerder (omwille van feit dat data noodzakelijk is voor de werking van de federale overheidsdiensten) → focus op BeSt Ad en CRAB = adresgegevens →

- 3 authentieke bronnen moeten ontsloten worden in één framework = probleem, o.a. omwille van de verschillende standaarden en taal.
- Zeer problematisch dat er niet één adressysteem voor handen is. Nu echter wel al een framework en een akkoord tussen de gewesten = goed.

Kadaster: federale overheid is wel eigenaar.

- Op VL niveau is er het GRB – dit was zeker eerder qua digitalisering.

Rol van NGI: geen uitspraak over doen, moeten dit voor zichzelf bepalen.

- Maar: kaarten waren (en zijn) “ontoegankelijk” – gegevens moeten betaald worden.
- E-gov gooit dit nu helemaal om – deze strijd hebben ze al verloren.
- Gewestelijk niveau heeft veel meer informatie en is wel veel toegankelijker.
- Hebben de oorlog wat verloren, zullen moeten vechten voor hun voortbestaan.

Heel veel actie op het gewestelijk niveau (VL voorop, dan BXL, dan WL – samen met FG, maar niet veel geweten over de acties die genomen worden op het WL niveau). WL zal echter ook wel met iets komen, maar daar is toch ook wel interne strijd (tussen WL en FG maar ook tussen WL/FG en BXL)

Lokale gemeenten:

- samenwerken met de lokale, gewestelijke dienstenintegrator is wat er moet gebeuren.
- Maar als het daar niet lukt kunnen we eventueel bijspringen – maar ook niet de financiële middelen + mogen dit eigenlijk ook niet doen (krijgen dan commentaar van het Rekenhof dat ons geld alleen voor federaal niveau mag gebruikt worden).
- Gewesten zijn de leidinggevendenden van de gemeenten, aan hun om daar mee om te gaan (zie o.a. het Gemeentendecreet)
- Belangrijk: hier is het dat vooral de private spelers opspringen → zij hebben de kennis, vergaren de data via een omweg of ontwikkelen systemen die kunnen gebruikt worden door de overheid.

Ontwikkeling van framework: bekijk het European Interoperability Framework → wettelijk kader is het eerste dat in orde moet zijn, dan het organisatorisch, daarna het technische pas. Europees kader gebaseerd op de complexe BE situatie.

Bouwblokken voor de e-services: er is nood aan zo'n systeem – federaal wordt dit door FEDICT ontwikkeld.

- Tegelijk is er nood aan een nieuw federaal model – een overkoepelend systeem van waar burgers en bedrijven (=users) worden doorgestuurd = daar zijn bouwblokken nuttig.
- Bovenlaag is MyBelgium
- Daaronder moet een systeem komen dat de gebruikers van MyBelgium linkt aan de oorspronkelijke systemen die zich bevinden bij de federale overheidsdiensten.
- Micro-services dienen dus eerder als een tussenkoppeling
- Probleem met de oorspronkelijke basissystemen: ontwikkeld voor intern gebruik, moeilijk om te herschrijven (kost, menselijke capaciteit etc.)

Uitdagingen op het federale niveau – hiërarchie?

- Federale overheid heeft de historiek niet mee: zwaar, langdurig verleden met processen die niet ontwikkeld zijn voor de digitale wereld.
- AGIC daarentegen heeft een sterke reputatie opgebouwd, de wetteksten zijn stevig en goed geschreven. Vanaf begin stond het digitale aspect centraal bij de federale overheid.
- Te weinig hiërarchie: ja klopt → “enorme handicap”: alle ministers hebben eigen politieke verantwoordelijkheid, eigen budgetten te verdedigen – maakt dingen niet eenvoudiger.
- VL heeft hier een veel sterkere rol gespeeld: alles gegroepeerd en samengevoegd = tanden laten zien.

Samenvoegen van FEDICT met andere verticale FODs: puur budgettair – rationalisering operatie waarbij de HR elementen zullen samengevoegd worden.

- Rol van FEDICT blijft – voorlopig – ongewijzigd. Zal niet zo'n grote impact hebben - moet vooral leiden tot meer efficiëntie.

Visie bij FEDICT over de rol van geodata

- Onbestaande voor de meeste zaken – waarom? Rol van NGI, wij kunnen ze bijstaan maar zij moeten het ontwikkelen.
- NGI kan een rol spelen als beheerder van de belangrijke data die niet bij de gewesten in beheer is, wij als FEDICT kunnen ze daarbij helpen en het technische aspect voor onze rekening nemen.
- BeStAd: ja daar is er wel een algemene visie – maar uitdagend proces: reeds sinds 2007 aan de gang en nu nog niet veel resultaten geboekt.

VL MAGDA platform: centraliseert de e-services die worden aangeboden ten aanzien van de lokale overheden

- Inderdaad een nuttig platform – zou ook nuttig zijn voor de federale overheid, maar: er is reeds heel wat informatie beschikbaar die gelinkt is aan het federale niveau.
- Algemeen probleem: diensten zijn vaak niet usercentric – waarom: omdat ze niet ontwikkeld zijn voor de users maar wel voor het eigen interne gebruik. Daarom gaat FEDICT hier een laag op bouwen die het mogelijk maakt het systeem verder te gebruiken.
- Voor MAGDA echter: boeiend, maar het is eigenlijk aan de lokale overheden om zich aan te passen aan het systeem dat de hogere overheid heeft gekozen. Als zij dit niet willen/kunnen, dan moeten ze naar de regionale dienstenintegrator gaan.
- Dus: problemen zijn zowel juridisch (FEDICT mag niet steeds tussenkomen) – financieel (er zijn gewoon geen middelen) – personeel (zelfde probleem).

Overzicht van alle e-services / datasets:

- Niet beschikbaar maar Dienst Administratieve Vereenvoudiging werkt daar aan.
- Wij hebben ook een lijst van alle diensten die we aanbieden – net zoals het KSZ.
- Voor de datasets is er geen overzicht, tegelijk ook heel aantal diensten die nooit gebruikt worden of gewoon niet nuttig zijn.

Opmerking: KSZ en FEDICT → twee gescheiden dienstenintegratoren omdat er vooral geen kruising van de data mocht plaatsvinden!

Zeker raadplegen: Interfederaal Agentschap voor het Kadaster – verschenen in KB op 29 september 2014 – zou al operationeel moeten zijn.

Relaties met andere FODs:

- nooit de rechtstreekse vraag om een applicatie te bouwen rond geografische data, maar soms wel de vraag om een probleem op te lossen.
- Vb. consultIMMO → kadaster werd helemaal hervormd maar er was niet voldoende gedacht aan het gebruik door externen. Gevolg: zware technische problemen.
