# Supplementary material
Source: MDPI journal article supplement (https://www.mdpi.com/2220-9964/6/9/282)
Supplement: s1 [file s1]

## Interview FPS Finance

For more information about this interview, please contact Mr. Maxim Chantillon (KU Leuven Public Governance Institute – [maxim.chantillon@kuleuven.be](mailto:maxim.chantillon@kuleuven.be))

### **Relation regions – federal administration**

Basic idea: Regions get their information via the Patrimonial Documentation (PD), however due to a discussion (more than 10 years) without a final agreement (fed and regions – especially Flanders – agreed to disagree).

- Buildings: registered by the regions (VL: GRB)
- Parcels: registered by the PD

This leads to a bizarre situation: regions will create their own maps and the federal level as well → leads to discrepancies (also because e.g. VL will update twice a year, PD has a different calendar). However, although there will be two layers, it is the idea to put the two layers together on one map so that the citizen (= user of the public e-service) can make use of one map.

It will also be ensured that there is enough data exchange between the PD and the regional administrations → will ensure that there is an extra control mechanism.

All this is discussed within the BUNI group (<https://overheid.vlaanderen.be/Gebouwenregister-Visie>)

➔ Created and falls under the INSPIRE Directive:

- o Past: discussion between NGI and PD
- o Now: discussion between Regions and PD
- o Aim: create various maps, but all on the same standards.
- o However, PD has the historical knowledge, therefore it is in a better position to take the lead on the topic.

### **Factors impacting the innovation / activities related to e-services and geodata**

- Political support for the implementation of the INSPIRE Directive = crucial
- Budget: innovation is still possible → e.g. new e-service platform is under development at the moment.
- General vision: increased focus on the digitalization + “marketization of the public sector (especially in the development of e-service)”

### **Authentic data**

“the first person (= i.e. organization) that is informed” → for building: regions, for parcels: PD.

### **Open data policy**

Depends on the situation – no overall and general framework that is applied. Agreements with some institutions, private sector depends on the situation – unclear whether or not there is a standard license available.

### **Relation with FEDICT**

No strong interaction between PD and Fedict – only some support for the BeSt Address case.

### **E-services in the FPS Finance**

#### CadGIS service:

- Paper versions until 2003-2004
- 2003: scans were made
- 2005: vectorization + digitalization → CadMAP was developed
- 2009: general diffusion → intranet version

- 2012: to the public – online available. – contains data of the year before (takes one year for the update)
- Now under development: new viewer with data of the week before.

Why? Required by architects, notaries, land surveyors, building companies etc.

Other e-services:

Developed and maintained under the responsibility of the FPS Finance – however, with support of the private sector via contracts offered in the ‘public market’.

URBAIN:

Interaction between PD and the communities/villages → new system is currently under development.

**Service integrator & Centralized system to acquire software**

- Service integrator: interesting – but central question for PD is what they can get out of this kind of system.
- Software: Interesting, PD can participate, but if possible and necessary then we just act on our own. → role of Fedict seems to be unclear in this framework.
