# Supplementary material
Source: MDPI journal article supplement (https://www.mdpi.com/2220-9964/6/9/282)
Supplement: s1 [file s1]

## Interview FEDICT

For more information about this interview, please contact Mr. Maxim Chantillon (KU Leuven Public Governance Institute – [maxim.chantillon@kuleuven.be](mailto:maxim.chantillon@kuleuven.be))

- **Toelichting organigram – werking FEDICT:** nadruk op 4 centrale taken uitgevoerd door onderdeel “programma, project en service management” = core business
  - IAA = identificatie, authenticatie, autorisatie – toegang van burgers tot de overheid
  - PGA = proces gerichte applicatie – ontwikkeling van applicaties voor de klanten (= FODs – PODs), kunnen ingezet worden voor verschillende doeleinden – sterke aan het evolueren – evolutie verloopt steeds in cycli (ong. 5 à 10 jaar, dan alles steeds herbekijken)
  - DIS = dienst integratie service – machine-naar-machine via SOA technologie – doel: informatie tussen verschillende FODs – PODs (1) laten doorstromen (2) vlot/efficiënt laten doorstromen
  - WCM = website technologie – 1 technologie/service aanbieden aan FODs – PODs om website te creëren – wederom enkel volledige dienstverlening, klant blijft verantwoordelijk voor inhoudelijke gedeelte. Nu ongeveer 120 websites op 1 model gebaseerd.
- **Consolidatie / positie van FEDICT door de jaren: cruciale punten**
  - Vrees andere FODs – PODs: overname door FEDICT, vandaar sterk ingezet op service element + horizontale houding.
  - Binden van FODs – PODs via verschillende dienstverleningsopties (“mond-aan-mond reclame)
  - Kostenbesparend element voor FODs – PODs
  - PGA ligt moeilijker voor klanten: raakt het hart van hun inhoudelijke beleid – daarom geen dwingende houding aannemen.
- **PGA → hieronder vallen e-services:**
  - groeiend belang van micro-services aangezien deze toepasbaar zijn binnen een breed aantal systemen en snel inzetbaar/aanpasbaar zijn (vb. signing element, log-in systeem, archiving etc).
  - micro-services vooral groeiend vanuit de FEDICT – niet echt vanuit de andere FODs – PODs (eerder proactief dan reactieve handeling)
  - weinig samenwerking met andere EU lidstaten of andere landen – vooral nadenken/innoveren vanuit de IT wereld en bekijken welke oplossingen ze aanbieden.
- **E-service – definitie: verschillende niveaus waarop een e-service zich kan voordoen:**
  - 1: Individuele burger niveau:
    - Steeds drie mogelijke acties op het front niveau:
      - Vragen van informatie / actie
      - Melden van iets
      - Info verzamelen
      - Kan telkens anoniem of niet-anoniem
    - Gekoppeld aan een drievoudig stappenplan:
      - Persoon/klant logt aan en doet één van de acties
      - Actie wordt doorgegeven via systeem
      - Info ophalen of pushen van info als reactie
    - In praktijk: een groot aantal problemen die zich voordoen (vb. ontbreken van relaties-connecties, informatie, incorrecte reactie etc)
    - Vb. e-Birth, Tax-On-Web etc.
  - 2: Middenlaag

- zelfde systeem maar minder geïndividualiseerd
  - overheid biedt data aan op een algemene manier – individu kan op zelf gebruik maken van de bredere data en belanghebbende onderdelen gebruiken.
- 3: Toekomst
  - Uitbouwen van een sterker geïntegreerde e-service die interactie tussen burger en overheid vereenvoudigd – “vb. paperless government”
  - Ontwikkelen van een box ecosysteem waarin het drievoudig stappenplan verwerkt zit in één tool.
- **Rol van geografische data:**
  - Heel weinig aandacht voor, 10 jaar geleden zelfs volledig onbestaande – daardoor nu nog steeds geen aandacht: er is onvoldoende alertheid voor dat soort zaken
  - Data is echter wel aanwezig in een groot aantal datasets en toepassingen
  - Probleem: onduidelijk waarvoor het kan gebruikt worden door de verschillende diensten.
    - NIS, Kadaster, BiZA, NGI: zeer duidelijk
    - Overheid in algemene zin echter onduidelijk = vooral een probleem van onwetendheid
  - NGI:
    - geen enkele geografische data ontvangen – enkel administratieve data wordt overgedragen.
    - data die NGI op dit ogenblik bezit is vaak niet te gebruiken op de manier waarop FEDICT op dit ogenblik omgaat met de klassieke datasets.
    - Geografische data volledig ontbrekend in catalogus van de beschikbare data.
    - Problemen:
      - data is enkel beschikbaar voor kleine selecte groep
      - vaak enkel op verouderde manier (CD, kaarten)
      - nu echter noodzakelijk voor groot aantal mensen
    - rol van NGI:
      - ze willen een soort van GEO-FEDICT worden = goed, complementair maar onvoldoende middelen – geen politiek spel – zeker een toegevoegde waarde
      - Tegelijk willen ze echter ook creator blijven van data
      - Eventueel noodzakelijk om daar een keuze te maken.
      - Daarom: noodzakelijk om geo-ecosysteem te ontwikkelen.
- **Rol van dienstenintegrator:**
  - 5 verschillende dienstenintegratoren: 1 Waalse zijde, 1 Vlaamse zijde, 1 Brussel (CIRB) en 2 op federaal niveau (FEDICT en KSZ)
  - Federaal niveau: FODs – PODs zijn opgedeeld: waarom? Verschillende vormen van dienstverlening (noot: niet geheel duidelijk waarom een samenvoeging van beide diensten niet zou kunnen – waarom diensten niet onder één paraplu kunnen functioneren – vooral in licht van geografische data)
  - Belangrijke rol van de datastroomlijning / dataprovider: applicatie / datatoepassing kan slechts slagen wanneer (1) data gestroomlijnd is op technisch vlak en administratief vlak en (2) er een dataprovider is aangesteld – hierbij komt ook belang van standaardisatie kijken.
    - Link naar authentieke bron: concept is volledig aan het veranderen - vroeger werkelijk een materiele authentieke bron, nu meer en meer georiënteerd op een virtuele authentieke bron.
    - Klassieke data (in handen van alle FODs – PODs) is zeer simpel qua databases maar link naar geodata is veel moeilijker te leggen omdat technische

systemen daar nog niet op afgestemd zijn. → hier zijn de verwachtingen over de implementatie van INSPIRE hoopvol (maar tegelijk: vooral gestuurd vanuit de regio's en slechts beperkte rol voor de federale administratie – FEDICT heeft een rol alsook het NGI)

- **Verwachtingen over studie:**
  - Ontwikkelen van een ecosysteem voor geodata (FEDICT blijft focussen op data in de klassieke data) – volgende elementen:
    - Wettelijk kader uitwerken
    - Werkmethoden en administratief kader ontwikkelen
    - Technische standaarden uitwerken
  - Hoe zo'n ecosysteem uitwerken: nuttig om de AGILE methode te gebruiken
    - Vroeger: projecten liepen vaak spaak omwille van de moeilijke aanpasbaarheid (functioneringskader echter constant in verandering + requirements onvoldoende vooraf gedocumenteerd) – gevolg: toepassingen werken onvoldoende en vertonen sterke gebreken.
    - Nu: AGILE methode – ongeveer 5 jaar in gebruik bij FEDICT – verschillende opties worden uitgewerkt en gedocumenteerd – sterk gevarieerd team waarbij aantal requirements vanaf begin veel uitgebreider en duidelijker is – korte deadlines – geen gebruik maken van klassieke productiecycclus.
- **Middelen:** vroeger betaalde FEDICT alles voor de klanten – verleden tijd: nu ook eigen bijdrage (verhoogt tegelijk echter ook het eigenaarschap)
  - toont ook het groeiend belang van de private sector: hebben eigen data ter beschikking, eventueel ook nuttig voor de overheid.
  - Daarom: private sector zeker betrekken in studie
- **Samenwerking met FODs – PODs:**
  - Sommigen willen heel sterke eigen invloed, andere laten de ontwikkeling van project over aan FEDICT
  - Ligt niet aan de FODs (grote, oorsprong etc) maar wel aan het project zelf.
- **Schematisch voorstelling visie:**
  - Blauw: huidige situatie – opgenomen door FEDICT voor een groot aantal FODs – PODs (geo data niet aanwezig)
  - Rood: toekomstige situatie met rol van NGI als beheerder van geo-ecosysteem en aanwezigheid van geodata in databank van de verschillende databases.
